1 **Infectious Entry of Merkel Cell Polyomavirus**

2

3 **Miriam Becker<sup>1,2</sup>, Melissa Dominguez<sup>1,2</sup>, Lilo Greune<sup>2,3</sup>, Laura Soria-Martinez<sup>1,2,4</sup>,**  
4 **Moritz M. Pfeleiderer<sup>4,5</sup>, Rachel Schowalter<sup>6</sup>, Christopher B. Buck<sup>6</sup>, Bärbel S.**  
5 **Blaum<sup>4,5</sup>, M. Alexander Schmidt<sup>2,3</sup> and Mario Schelhaas<sup>\*1,2,4</sup>**

6

7

8 <sup>1</sup>Institute of Cellular Virology, ZMBE, University of Münster, Germany

9

<sup>2</sup>Cluster of Excellence EXC1003, Cells in Motion, CiM, Münster, Germany

10

<sup>3</sup>Institute of Infectiology, ZMBE, University of Münster, Germany

11

<sup>4</sup>Research Group, FOR2327 “ViroCarb”, Coordinating University of Tübingen,  
Germany

12

13

<sup>5</sup>Interfaculty Institute of Biochemistry (IFIB), University of Tübingen, Germany

14

<sup>6</sup>Center for Cancer Research, National Cancer Institute, Bethesda, MD, USA

15

16

17

**Running title: MCPyV entry into host cells**

18

19

20

21

**Key words: polyomavirus, MCPyV, virus entry, virus-host interaction,**  
22 **endocytosis**

23

24

25

26

27 **Abstract**

28 Merkel Cell Polyomavirus (MCPyV) is a small, non-enveloped tumor virus associated  
29 with an aggressive form of skin cancer, the Merkel cell carcinoma (MCC). MCPyV  
30 infections are highly prevalent in the human population with MCPyV virions being  
31 continuously shed from human skin. However, the precise host cell tropism(s) of  
32 MCPyV remains unclear: MCPyV is able to replicate within a subset of dermal  
33 fibroblasts, but MCPyV DNA has also been detected in a variety of other tissues.  
34 However, MCPyV appears different from other polyomaviruses as it requires sulfated  
35 polysaccharides such as heparan sulfates and/or chondroitin sulfates for initial  
36 attachment. Like other polyomaviruses, MCPyV engages sialic acid as a (co-  
37 )receptor. To explore the infectious entry process of MCPyV, we analyzed the cell  
38 biological determinants of MCPyV entry into A549 cells, a highly transducible lung  
39 carcinoma cell line, in comparison to well-studied simian virus 40 and a number of  
40 other viruses. Our results indicate that MCPyV enters cells via caveolar/lipid raft-  
41 mediated endocytosis but not macropinocytosis, clathrin-mediated endocytosis or  
42 glycosphingolipid-enriched carriers. The viruses internalized in small endocytic pits  
43 that led the virus to endosomes and from there to the endoplasmic reticulum (ER).  
44 Similar to other polyomaviruses, trafficking required microtubular transport,  
45 acidification of endosomes, and a functional redox environment. To our surprise, the  
46 virus was found to acquire a membrane envelope within endosomes, a phenomenon  
47 not reported for other viruses. Only minor amounts of viruses reached the ER, while  
48 the majority was retained in endosomal compartments suggesting that endosome-to-  
49 ER trafficking is a bottleneck during infectious entry.

50

51

52

53 **Importance**

54 MCPyV is the first polyomavirus directly implicated in the development of an  
55 aggressive human cancer, the Merkel Cell Carcinoma (MCC). Although MCPyV is  
56 constantly shed from healthy skin, MCC incidence increases among aging and  
57 immunocompromised individuals. To date, the events connecting initial MCPyV  
58 infection and subsequent transformation still remain elusive. MCPyV differs from  
59 other known polyomaviruses concerning its cell tropism, entry receptor requirements,  
60 and infection kinetics. In this study, we examined the cellular requirements for  
61 endocytic entry as well as the subcellular localization of incoming virus particles. A  
62 thorough understanding of the determinants of the infectious entry pathway and the  
63 specific biological niche will benefit prevention of virus-derived cancers such as  
64 MCC.

65

66

67

68

69

70

71

72

73

74

75

76

77

78

## 79 **Introduction**

80 Polyomaviruses (PyV) are small, non-enveloped dsDNA viruses with a diameter of  
81 45-50 nm. The icosahedral (T=7) capsids consist of 72 homopentameric capsomers of  
82 the major capsid protein VP1 with minor capsid proteins VP2/VP3 located within a  
83 cavity underneath the VP1 pentamers. The PyV capsid harbors a chromatinized,  
84 circular dsDNA genome of about 5 kb (1, 2). Well-studied PyV such as simian virus  
85 40 (SV40), and murine PyV (mPyV) possess a broad cell tropism and can transform  
86 cells *in vitro* and in animals (3, 4). Of the human polyomaviruses, JC and BK virus  
87 are the best studied (5, 6). JC and BK viruses were initially identified in brain and  
88 urine samples, respectively (7, 8). Initial infection with these viruses occurs early in  
89 life and typically leads to persistent infections that are typically benign (9-11). Upon  
90 immunosuppression, however, persistent JC and BK virus infections may lead to  
91 severe diseases, such as progressive multifocal leukoencephalopathy or PyV-  
92 associated nephropathy, with potentially fatal outcomes (3, 4).

93

94 In 2008, Feng and colleagues identified Merkel cell polyomavirus (MCPyV) in a rare  
95 form of skin cancer known as Merkel cell carcinoma (MCC) (12). MCC is an  
96 aggressive cancer with increasing incidence (13, 14), which is most likely to develop  
97 in immunocompromised and elderly populations upon prolonged UV exposure (15,  
98 16). About 80% of MCC are positive for MCPyV DNA integrated into the host  
99 genome (12). As for most PyV, MCPyV infections are widespread and predominantly  
100 asymptomatic. In fact, MCPyV is continuously shed from healthy skin with a  
101 prevalence of 60-80% (17-19). However, MCPyV DNA has also been isolated from  
102 respiratory, urine and blood samples (20), and the range of tissues in which  
103 persistent infection can be established is thus still unclear. The presence of  
104 integrated MCPyV DNA in MCC cells is thought to cause cancer through the

105 continuous expression of the transforming large T (LT) and small T (sT) antigens.  
106 Integration of the viral DNA into the host cell genome is coupled to truncation of the  
107 LT C-terminal domain, which is important for viral genome replication and can induce  
108 p53 activity, triggering cell cycle arrest (21, 22). The viability of MCC cells depends  
109 on expression of LT and/or sT, as pan-T knock-down in MCC-derived cells lead to  
110 cell death (23, 24). Importantly, the cellular origin of MCC is still under debate. A  
111 recent report suggests dermal fibroblasts as target cells for productive infection,  
112 whereas Merkel cells are not permissive for virus entry or productive infection (25,  
113 26). Thus, it remains unclear exactly which events give rise to MCC.

114

115 Since cell culture systems to produce sufficient quantities of infectious MCPyV are  
116 not readily available, MCPyV vectors, so called pseudoviruses (PsV), are important  
117 tools to study entry. As MCPyV does not contain detectable levels of VP3 (27), PsV  
118 consist of VP1/VP2-only capsids that harbor a reporter plasmid (e.g. coding for  
119 EGFP or luciferase). Expression of the reporter allows easy readout for successful  
120 entry, i.e. delivery of the viral DNA to the site of transcription and replication (28). In  
121 an effort to identify MCPyV-permissive cell lines and to better understand the tissue  
122 tropism of MCPyV, the tumor cell library NCI-60 was screened for transducibility and  
123 ability to support virus replication with MCPyV PsV and native virions, respectively  
124 (29). Of those, A549 cells, a non-small cell lung cancer cell line, showed robust  
125 transducibility with MCPyV PsV (28).

126

127 Since MCPyV is an emerging virus, little is known about the basic biology of the  
128 virus, in particular how initial infection occurs. Initial studies on the mechanism of  
129 MCPyV infection addressed cell surface interactions and cellular tropism of MCPyV  
130 (25, 28, 30). MCPyV relies on binding sulfated glycosaminoglycans (GAGs) for initial

131 attachment similar to papillomaviruses (28). However, it also requires interaction with  
132 carbohydrates containing a linear sialic acid motif, i.e. Neu5Ac $\alpha$ 2-3Gal, like other  
133 PyV (28, 30, 31).

134

135 Different viruses utilize distinct preexisting cellular endocytosis pathways for  
136 infectious entry (32). These endocytic pathways are characterized by a specific set of  
137 cellular factors and regulators facilitating endocytic vesicle formation. This set of  
138 cellular factors is used to distinguish different pathways. Well-studied endocytic  
139 pathways include clathrin-mediated endocytosis (CME), caveolar/lipid raft-mediated  
140 endocytosis, and macropinocytosis (33), which are essential for receptor-mediated  
141 endocytosis, turnover of plasma membrane receptors and fluid-phase uptake. To  
142 facilitate safe delivery and release of the viral genome to and at the site of replication,  
143 viruses are routed through specific intracellular target organelles, such as  
144 endosomes, the Golgi apparatus, or the endoplasmic reticulum (ER).

145

146 Host cell entry of most PyV occurs by caveolar/lipid raft-mediated endocytosis (34-  
147 37), whereas JC virus, for example, uses CME (38). After endocytosis, virions are  
148 routed through the endosomal pathway to be delivered to the ER (39). There, a  
149 chaperone- and disulfide isomerase-mediated uncoating step occurs, whereupon the  
150 modified particles are translocated into the cytosol by the ER-associated degradation  
151 machinery (40-43). In the current study, we aimed to identify the cellular  
152 requirements for virus entry into host cells to understand similarities and differences  
153 to other PyV. For this, we used small compound inhibitors of decisive cellular  
154 factors/processes during MCPyV infection. As functional controls, we employed well-  
155 studied viruses, including SV40, the papillomavirus HPV16, or the alphavirus Semliki  
156 Forest Virus (SFV) (36, 44, 45). In addition, we characterized the entry route of

157 MCPyV by ultrathin section transmission electron microscopy (TEM). Our results  
158 support a model in which MCPyV enters A549 cells by caveolar/lipid-raft dependent  
159 endocytosis, and where viruses are routed through the endosomal pathway to the  
160 ER. To our surprise, we found that MCPyV acquired a lipid membrane within  
161 endosomes. This membrane was absent once the virus located in the ER.

162 **Results**

163 **MCPyV PsV cell binding and infection depend on sulfated glycosaminoglycans**

164

165 To study the infectious entry requirements of MCPyV, we tested the susceptibility of  
166 the keratinocyte-derived cell lines HeLa and HaCaT in comparison to A549 cells.  
167 Using PsV we found that neither HeLa nor HaCaT cells showed GFP expression  
168 72 h post infection and are thus poorly permissive for MCPyV entry (Fig. 1 A). We,  
169 therefore, decided to use A459 cells for our study, which allow for infectious  
170 internalization as previously described (29).

171

172 As initial strategy to elucidate the cellular route(s) of entry, perturbation of cellular  
173 processes followed by infection is key to identify factors/organelles facilitating  
174 MCPyV entry. The time course of MCPyV infectious entry into A549 cells was rather  
175 slow and plateaued after 72 h post infection (p.i.) (data not shown). Since indirect  
176 effects occur often after prolonged cellular perturbation, it is important to minimize  
177 such effects (46). For this, we compared siRNA-mediated knockdown, expression of  
178 dominant negative mutants, and small compound inhibition (data not shown). The  
179 efficacy and reliability of siRNA-mediated knockdown and expression of dominant  
180 mutants turned out to be questionable, as judged by infection of control viruses, so  
181 that we turned exclusively to small compound inhibition.

182

183 We first tested whether inhibition of acidification of endosomal compartments with the  
184 weak base ammonium chloride (NH<sub>4</sub>Cl) perturbed MCPyV infection (47). In the  
185 presence of NH<sub>4</sub>Cl, MCPyV infection was blocked in a dose-dependent fashion (Fig.  
186 1 B) similar to infection with SV40 and HPV16, which served as positive controls (45,



187 48). This indicates the requirement for low pH in endosomal compartments during  
188 infectious internalization of MCPyV.

189

190 SV40 is directed to the ER for uncoating and subsequent translocation to the cytosol  
191 using ER resident disulfide oxidoreductases and the ER-associated degradation  
192 machinery (40). Dithiothreitol (DTT) is a powerful reducing agent and thus perturbs  
193 the cellular redox environment and disulfide oxidoreductase functions (49).  
194 Accordingly, DTT treatment arrests SV40 in the ER (40). We tested whether MCPyV  
195 was also sensitive to DTT treatment. MCPyV and SV40 infectivity was clearly  
196 reduced in the presence of DTT, whereas entry of Semiliki Forrest virus (SFV), which  
197 does not require a redox-driven ER uncoating step (44), was unaffected (Fig. 1 C).

198

199 Next, the ability of NH<sub>4</sub>Cl or DTT to block MCPyV infection in relation to the time  
200 course of entry was tested. For this, the drugs were added different times p.i.. NH<sub>4</sub>Cl  
201 and DTT exhibited a similar propensity to block MCPyV infection, where infectivity  
202 was inhibited upon early addition and increased with additions at later time point (Fig.  
203 1 D). The increase at later time points indicates that the virus had passed the step  
204 blocked by the drugs. At 30 h p.i., about 50% of MCPyV had passed the acid-  
205 activated step, whereas the redox-dependent step appeared to occur slightly later  
206 (Fig. 1 D). The time courses indicate in addition a rather slow and asynchronous  
207 entry process akin to HPV16 (Fig. 1 D, (45)).

208

209 Prolonged treatment of cells with drugs that block endocytosis and trafficking can  
210 have indirect or cytotoxic effects. To address this problem, we employed an inhibitor  
211 swap approach in which cells were transiently treated with a drug of interest followed  
212 by replacement by another that blocks entry at a later stage, such as acid activation

213 in endosomes or redox-mediated uncoating in the ER (45, 46). Moreover, several  
214 different viruses served as positive and negative controls to assess the efficacy of  
215 treatment as well as the potential for pleiotropic drug effects.

216

217 Initially, as proof of feasibility, the requirement for sulfated GAGs was tested. MCPyV  
218 attachment to cells generally depends on such GAGs (28, 30, 31). Therefore,  
219 treatment with sodium chlorate ( $\text{NaClO}_3$ ) was used to induce production of  
220 undersulfated GAGs (50). Treatment of A549 cells with 10, 20, or 30 mM  $\text{NaClO}_3$  for  
221 16 h prior to inoculation with MCPyV produced a dose-dependent reduction in  
222 infectivity (Fig. 1 E). HPV16 infectivity was similarly reduced, as expected (51). In  
223 contrast, infection with SV40 was unaffected, suggesting different requirements for  
224 the two PyV (Fig. 1 E). In addition, we tested the inhibitory effect of heparin, a highly  
225 sulfated GAG, on MCPyV infection. In line with previous results (28), preincubation of  
226 MCPyV pseudovirions with heparin efficiently blocked infection, only slightly less  
227 efficiently than the positive control HPV16 (Fig. 1 F). Influenza A virus (IAV) was  
228 used as a negative control, as IAV infection depends on interaction with sialic acids  
229 (52) and is independent of GAG binding. Heparin did not affect IAV infectivity (Fig. 1  
230 F). Taken together, the results confirm that MCPyV infection requires interactions  
231 with sulfated cell-surface GAGs.

232

### 233 **Inhibitory profile of MCPyV endocytosis**

234

235 After confirming previous reports, we set out to characterize the endocytic pathway  
236 employed by MCPyV. First, CME was blocked with the small molecule inhibitor  
237 pitstop2, which interacts with the clathrin N-terminal domain and thereby interferes  
238 with assembly of the clathrin coat (53). Infection with MCPyV was unaffected by

239 treatment with pitstop2 (Fig. 2 A), similar to SV40, which enters cells by  
240 caveolar/lipid-raft endocytosis (34, 36, 48). As expected, infection with SFV, which  
241 enters cells by CME (44, 54), was efficiently reduced. Thus, MCPyV entry occurs  
242 independently of CME.

243

244 Another important regulator of several endocytic pathways is dynamin-2 (Dyn2). The  
245 large GTPase regulates scission of endocytic pits in several endocytic pathways, i.e.  
246 CME, caveolae/lipid raft-mediated endocytosis, IL-2 endocytosis, and phagocytosis  
247 (32). To study a potential Dyn2 involvement in MCPyV uptake, dynasore (an inhibitor  
248 of the dynamin GTPase activity) was employed (55). SV40 served as a positive  
249 control as it is known to depend on Dyn2 activity (56). Infection of MCPyV was  
250 blocked dose-dependently by dynasore to a residual level of  $22\pm 13\%$ , similar to  
251 SV40 (Fig. 2 B). As a negative control, HPV16 was used. HPV16 enters host cells by  
252 a clathrin-, caveolin-, cholesterol- and dynamin-independent, but actin-dependent  
253 endocytic pathway (45). As expected, HPV16 infection remained unperturbed or  
254 even increased after dynasore treatment (Fig. 2 B). This indicates that MCPyV is  
255 endocytosed by a Dyn2-dependent pathway similar to SV40 but distinct from HPV16  
256 endocytosis.

257

258 To further ascertain that MCPyV enters cells by a similar endocytic mechanism as  
259 SV40, we perturbed cholesterol-dependent caveolar/lipid-raft endocytosis. To this  
260 end, we treated cells with nystatin and progesterone, which sequester cholesterol  
261 and prevent cholesterol synthesis, respectively (34, 56-59). As expected, infection  
262 with MCPyV and SV40 were inhibited upon perturbation of cholesterol to residual  
263 levels of  $31\pm 8\%$  and  $34\pm 11\%$ , respectively (Fig. 2 C), whereas HPV16 infection

264 remained unaffected as described previously (45). This suggests that MCPyV  
265 infection, like SV40 infection, requires cholesterol-rich membrane domains (34).

266

267 Next, a potential role for macropinocytosis was assessed. The Na<sup>+</sup>/H<sup>+</sup>-exchanger  
268 regulates macropinocytosis by controlling submembraneous pH, which in turn  
269 regulates the formation of membrane protrusions (60). Ethylisopropylamiloride  
270 (EIPA)-mediated inhibition of the Na<sup>+</sup>/H<sup>+</sup>-exchanger (61) is a classical treatment to  
271 interfere with macropinocytosis. This treatment neither affected MCPyV nor SV40  
272 infection (Fig. 2 D), whereas HPV16 infection was efficiently blocked as expected  
273 (45). Thus, MCPyV endocytosis occurs independently of the Na<sup>+</sup>/H<sup>+</sup>-exchanger and,  
274 consequently, also of macropinocytosis or related pathways.

275

276 In summary, MCPyV entry required cholesterol-rich membranes and dynamin, but  
277 did not require clathrin or macropinocytic pathways. These observations are most  
278 consistent with an entry pathway that employs caveolar/lipid-raft mediated  
279 endocytosis.

280

281 **Regulation of MCPyV endocytosis depends on actin dynamics, Rho-like**  
282 **GTPases and signaling via Tyr kinases and phosphatases PP1 and PP2A/B**

283

284 Next, we addressed functional regulators involved in endocytic processes with  
285 respect to their role in MCPyV entry.

286

287 Actin polymerization is required for most endocytic pathways employed by viruses,  
288 where formation of protrusions, intracellular transport or vesicle scission is facilitated  
289 (32, 45). Cytochalasin D and jasplakinolide inhibit actin dynamics by either blocking

290 polymerization or depolymerization, respectively (62, 63). Both cytochalasin D and  
291 jasplakinolide efficiently blocked MCPyV and SV40 infection (Fig. 3 A, B), where the  
292 inhibitory effect of jasplakinolide was less pronounced for SV40. In contrast, CME-  
293 mediated uptake of SFV was unaffected by stabilization of actin filaments (Fig. 3 B)  
294 and increased upon actin depolymerization (Fig. 3 A).

295  
296 Actin polymerization is most often regulated by the activity of pathway-specific Rho-  
297 like GTPases (32, 64, 65). Toxin B from *C. difficile* is a broad inhibitor of all Rho-like  
298 GTPases (66) and was hence used to assess the relevance of Rho GTPases for  
299 infection by MCPyV and SV40. As a negative control, we used HPV16 infection,  
300 which was not perturbed by treatment with toxin B, as expected (Fig. 3 C, (45)).  
301 Toxin B reduced MCPyV and SV40 infection to  $15\pm 18\%$  and to  $0.1\pm 0.1\%$  residual  
302 infection, respectively (Fig. 3 C). From this we conclude that Rho-like GTPases likely  
303 mediate actin-dependent steps during MCPyV endocytosis (Fig. 3 C). Analogous to  
304 SV40, the key step may be actin-dependent closure and fission of endocytic vesicles  
305 from the plasma membrane (56).

306  
307 Ligand-induced activation of tyrosine kinases (tyr-kinases) regulates the activation of  
308 several endocytic pathways such as macropinocytosis and caveolar/lipid raft-  
309 mediated endocytosis, whereas CME and other pathways are tyr-kinase independent  
310 (32, 65). Genistein, a broad and efficient inhibitor of tyr-kinases (67), was used during  
311 infection with MCPyV, SV40, and HPV16. As expected for HPV16 and SV40,  
312 infection was blocked upon treatment with 200  $\mu\text{M}$  genistein (Fig. 3 D). Interestingly,  
313 MCPyV infection was already sensitive to 50  $\mu\text{M}$  genistein treatment (Fig. 3 D)  
314 suggesting a strong requirement for tyr-kinases, potentially at multiple levels.

315

316 Next, cellular phosphatases were inhibited with the broadly active sodium  
317 orthovanadate, a competitive inhibitor of all phosphatases (68, 69). Entry of MCPyV,  
318 SV40 and HPV16 were all strongly inhibited in the presence of orthovanadate (Fig. 3  
319 E). Okadaic acid, a more specific inhibitor of phosphatases families PP1, PP2A and  
320 PP2B (70), also inhibited MCPyV, SV40 and HPV16 (Fig. 3 F).

321  
322 In summary, MCPyV entry is likely facilitated by dynamic actin rearrangement that is  
323 regulated by Rho-like GTPases, as well as by the activity of tyr-kinases and PP1  
324 and/or PP2A/B phosphatases.

325

326 **Intracellular trafficking of MCPyV requires endosomal acidification, functional**  
327 **microtubular dynamics, and an intact redox environment**

328

329 Treatment with NH<sub>4</sub>Cl reduced MCPyV infection indicating an acid-activation step  
330 (Fig. 1 B). To test whether this acid-activated step occurred in endosomes,  
331 bafilomycin A1, an inhibitor of the endosomal proton pump V-ATPase, was used (71).  
332 Bafilomycin A1, like NH<sub>4</sub>Cl, inhibited the infectivity of MCPyV, SV40, and HPV16 in a  
333 dose-dependent fashion (Fig. 4 A). Thus, MCPyV depends on low endosomal pH for  
334 either acid activation or trafficking within maturing endosomes.

335

336 Most intracellular transport occurs along microtubules (72). To assess microtubule  
337 involvement in MCPyV infection, depolymerization of microtubules by treatment with  
338 the polymerization blocker nocodazole was used (73). As reported previously, SV40  
339 and HPV16 entry require the integrity of microtubules (Fig. 4 B). Similarly, MCPyV  
340 infection strongly depended on intact microtubular dynamics (Fig. 4 B). This suggests

341 that MCPyV requires microtubules for transport of vesicular compartments or of the  
342 virus itself during host cell entry.

343

344 To study the involvement of intracellular transport processes from the ER to the Golgi  
345 apparatus in MCPyV entry, we used brefeldin A, which eventually leads to Golgi  
346 collapse into the ER (74). Upon perturbation with brefeldin A, infection with MCPyV,  
347 SV40, and HPV16 were blocked (Fig. 4 C). This indicates that infection with these  
348 viruses requires the functional integrity of the secretory ER/Golgi compartments.

349

350 Another hint for an involvement of the ER during infectious internalization can be  
351 drawn from the perturbation of the cellular redox environment by DTT. At the  
352 concentrations used, DTT interferes mostly with the formation of disulfide bonds  
353 during folding in the ER but not with existing disulfide bonds in folded proteins (49).  
354 Since MCPyV infection was blocked by DTT (Fig. 1 C), it is reasonable to assume  
355 that MCPyV like SV40 requires an ER step for host cell entry, possibly for uncoating  
356 and translocation into the cytosol.

357

358 After escape from the ER, SV40 is thought to be imported into the nucleus via the  
359 nuclear pore complexes (75). In contrast, HPV16 requires cell cycle progression, i.e.  
360 nuclear envelope breakdown, for nuclear entry (76, 77). To address whether MCPyV  
361 infection depends on mitotic activity for nuclear entry, we blocked cells in S-phase  
362 using aphidicolin, an inhibitor of DNA polymerase alpha and delta (78). MCPyV entry  
363 was efficiently blocked by aphidicolin to a similar extent as HPV16 (Fig. 4 D). The  
364 RNA virus SFV replicates in the cytoplasm and therefore served as a negative  
365 control (79). SFV infection was not affected by aphidicolin treatment (Fig. 4 D), as

366 expected. These results indicate that MCPyV infection may depend on the mitotic  
367 activity of the host cells.

368

### 369 **MCPyV is internalized into small, non-coated vesicles**

370

371 Our inhibition studies indicate that MCPyV and SV40 use similar pathways to infect  
372 cells. To confirm this notion, we examined virion trafficking using TEM. Localization  
373 of virus particles was assessed 2, 8, 16, 24 and 48 h p.i.. Interestingly, the virus  
374 localized to several specific cellular compartments at each time-point, in line with  
375 asynchronous internalization and trafficking of the MCPyV particles. Virus particles  
376 were readily detectable bound to the cell surface (Fig. 5 A). In addition, they were  
377 found within small, inward budding membrane invagination without any visible protein  
378 coat (Fig. 5 A, B). Interestingly, virions resided in two distinct but equally frequent  
379 populations of invaginations. In one class of invagination, the plasma membrane  
380 appeared to make close contact with the virion surface, while the second class of  
381 invagination exhibited  $10 \text{ nm} \pm 8 \text{ nm}$  distances between the membrane and the virion  
382 surface. The first class of invagination is reminiscent of prior observations for SV40,  
383 which is known to make close contact with the sialylated headgroups of plasma  
384 membrane glycolipids (80, 81). The latter class of invagination suggests possible  
385 interactions between the virion and a glycoprotein receptor with a large ectodomain,  
386 such as an HSPG. In addition, MCPyV virions were found within intracellular vesicles  
387 without an apparent protein coat (Fig. 5 C). These data, and the absence of virus in  
388 large, coated or tubular invaginations, is consistent with MCPyV uptake by  
389 caveolar/lipid raft-mediated endocytosis rather than uptake by macropinocytosis,  
390 CME or glycosphingolipid-enriched carriers (58, 81-83).

391



## 392 **MCPyV traffics via the endolysosomal route to the ER**

393

394 After initial uptake into endocytic vesicles, MCPyV particles were found in early  
395 endosomal compartments and later accumulated in late endosomal/lysosomal  
396 structures (Fig. 6 A, B). Other polyomaviruses, such as SV40, JCPyV and BKPyV,  
397 are then trafficked to the ER via Golgi- and non-Golgi routes. In the ER,  
398 oxidoreductases and chaperones mediate partial disassembly of the virions  
399 (uncoating) and transfer of partially disassembled virions into the cytosol (40, 81, 84-  
400 86). MCPyV was undetectable in the Golgi apparatus (Fig. 6 D), the cytosol, or the  
401 nucleus. Similar to other PyV, MCPyV was observed in the lumen of the ER, but only  
402 to a minor extent (Fig. 6 C).

403

404 Taken together, the EM results thus support the conclusion that MCPyV and SV40  
405 use similar infectious entry pathways.

406

## 407 **MCPyV acquires a lipid envelope in endosomal compartments**

408

409 In addition to the observations described above, we surprisingly found MCPyV  
410 particles with what appeared to be a double layer lipid membrane in endosomal  
411 compartments (Fig. 7 A, B). The membrane tightly enveloped the particles. The  
412 enveloped virions were easily detectable in maturing and late endosomes as well as  
413 endolysosomes similar to non-enveloped particles. In fact, both enveloped and non-  
414 enveloped particles were detectable side by side in the same endosomes (Fig. 7 C,  
415 enveloped black arrows vs. non-enveloped white arrow). This suggested that the  
416 process of acquiring a lipid envelope occurs during viral passage of the endosomal  
417 pathway rather than in distinct, specialized organelles. It is unclear whether the

418 enveloped particles are part of the productive infectious entry pathway or are instead  
419 a dead end for the virus. Possibly, this phenotype reflects a new mode of antiviral  
420 defense or a mechanism to evade endosomal degradation.

421

## 422 **The role of sialic acid for MCPyV entry**

423

424 Previous studies showed that mutations in the sialic acid binding pocket of MCPyV  
425 VP1 rendered the particle non-infectious but did not perturb binding to cells (30).  
426 Hence, sialic acid interaction is essential for infectious entry, whereas initial  
427 attachment occurs mainly by GAG engagement. Since we observed MCPyV particles  
428 in endocytic pits in two distinct populations that may reflect binding to gangliosides  
429 and HSPGs, two sialic acid binding site mutants (W76A and Y81V) were followed  
430 using EM. The mutant PsV assembled without visible defects (Fig. 8 A, B i, C i), but  
431 were unable to mediate infection in A549 cells (Fig. 8 D), as expected (30). To verify  
432 the desired glycan binding abilities of the sialic acid mutants, we conducted  
433 saturation transfer difference (STD-) NMR experiments to probe for binding of  
434 sialylated oligosaccharides and GAG oligosaccharides to MCPyV wild-type and  
435 mutant virus-like particles (VLPs). STD-NMR makes use of energy transfer from  
436 proteins to their ligands upon binding and thus allows determination of binding  
437 specificities by comparing the changes in the resonance frequencies of the ligand  
438 molecules in association with wild-type or mutant viruses (30, 87). Here,  
439 3'-sialyllactose (3'SL) and a chemically well-defined heparan sulfate (HS)-  
440 pentasaccharide, Arixtra (Ax), were chosen as a minimal sialylated MCPyV ligand  
441 and a short GAG oligosaccharide, respectively (Fig. 9 A, B). STD-NMR showed that  
442 the GAG pentasaccharide bound to wild-type VLPs as well as to the W76A mutant  
443 (Fig. 9 B ii vs. iii). In contrast, 3'SL bound both wild-type and Y81V mutant VLPs but

444 no saturation transfer was observed from the W76A mutant to 3'SL (Fig. 9 A ii vs. iii  
445 vs. iv). Consistent with previous crystallographic and NMR-based results (30), only  
446 resonances from the 3'SL sialic acid and galactose rings were observed. For the HS  
447 pentasaccharide (Fig. 9 B), on the other hand, magnetization transfer was observed  
448 almost equally for all five monosaccharide units, with the non-sulfated GlcA ring  
449 being the only unit, whose resonances were somewhat underrepresented in the  
450 STD-NMR spectra in comparison to the  $^1\text{H}$  reference spectrum of the free  
451 pentasaccharide. This suggests that the GlcA ring is the least important determinant  
452 in the interaction. In summary, these results confirm that the W76A mutant is  
453 defective in sialic acid binding, whereas Y81V remained partially able to interact with  
454 the 3'SL ligand under these conditions. Furthermore, the binding site for GAGs  
455 apparently remained intact upon mutation suggesting that the GAG binding site is  
456 spatially distinct from the sialic acid interaction site.

457

458 EM analyses showed that the W76A and Y81V mutants readily bound to the A549  
459 cells, presumably through interactions with HSPGs (Fig. 8 B ii, C ii; (30)).  
460 Interestingly, both mutants were exclusively observed in the second class of  
461 invaginations (i.e., invaginations with a  $>5$  nm gap between the plasma membrane  
462 and the virion surface (Fig. 8 B ii, C ii). This observation supports the concept that the  
463 first class of invaginations are formed through short range contacts between the  
464 virion and sialylated glycolipids (which the mutants fail to bind), while the second  
465 class of invagination involves interactions with bulkier HSPGs.

466

467

468

469

470 **Discussion**

471

472 MCPyV is the first human PyV clearly linked to the development of a specific cancer  
473 (12). Initial studies on the principal mechanism of infection confirmed the requirement  
474 of sulfated glycosaminoglycans for attachment and sialylated glycans for infectious  
475 uptake into host cells, which may, in fact, reflect a common mechanism for several  
476 PyV (28, 30, 31, 88). To extend our knowledge of the mechanism of initial infection,  
477 we addressed additional cellular requirements and routes of virus entry. Our  
478 evidence from inhibitor and morphological studies indicates that MCPyV infects cells  
479 asynchronously via a caveolar/lipid-raft dependent endocytic pathway that is similar  
480 to that used by SV40. After internalization, virus particles were routed to  
481 endolysosomal compartments and the ER. Our preliminary evidence suggests that  
482 entry of MCPyV depends on progression of the cell cycle, potentially for the nuclear  
483 entry step.

484

485 The initial step of virus entry is binding to target cells. Previous work suggested that  
486 the interaction with sulfated GAGs is required for MCPyV binding, whereas sialic  
487 acids have a post attachment role (28). We confirmed that heparin, a highly sulfated  
488 GAG, was able to compete for cell surface GAGs thus prohibiting binding and  
489 infection of A549 cells. In addition, we addressed the role of GAGs and sialic acids  
490 concerning their influence on endocytic uptake. Interestingly, we observed two  
491 populations of MCPyV particles on the plasma membrane and in endocytic pits  
492 differing in their distance to the limiting membrane, possibly representing the different  
493 binding receptor species. In principle, these could reflect binding to proteinaceous  
494 receptors with a large ectodomain (wide pits) or gangliosides (sialylated lipids, tight  
495 pits), as shown for JC virus uptake via sialylated glycoproteins (89) and SV40 uptake

496 by ganglioside interaction (90). Alternatively, the proteinaceous receptor may  
497 constitute HSPGs.

498

499 To further unravel the individual roles of sialylated glycans and GAGs during MCPyV  
500 entry, two sialic acid binding site mutants (W76A and Y81V, (30)) were subjected to a  
501 STD-NMR-based binding assay. These studies confirmed that binding to sialylated  
502 glycans was abolished for W76A, but not for Y81V, whereas either mutant retained  
503 binding of the HS pentasaccharide. This finding indicates that the binding sites for  
504 sialic acid and sulfated GAGs do not overlap and are independent of each other. The  
505 most striking difference between wild-type MCPyV and the sialic acid binding site  
506 mutants in the TEM experiments was that the mutants were exclusively detected in  
507 endocytic pits with the large distances between viral particles and plasma membrane  
508 layers. The most likely interpretation of these observations is thus that the large  
509 distance reflects binding to a proteinaceous receptor containing sulfated GAGs such  
510 as HSPGs, whereas tightly fitted binding to the plasma membrane reflects  
511 ganglioside engagement. Since uptake of HSPGs has been suggested to occur  
512 primarily through flotillin- and dynamin-dependent endocytosis (91, 92), MCPyV  
513 internalization in wider pits via HSPGs seems distinct from the caveolar/lipid raft-  
514 mediated internalization required for infection. It thus appears that MCPyV  
515 internalization via HSPGs is a dead end. While W76A and Y81V MCPyV were readily  
516 observable in endosomes, they were not detected in the ER. Hence, the W76A and  
517 Y81V mutations likely rendered the particles non-infectious, as they were unable to  
518 engage sialic acid containing gangliosides efficiently and thus were not taken up by  
519 an infectious pathway that routes the virus to ER.

520

521 Since the sialic acid binding mutants were found in endosomes but not the ER, the  
522 interaction with sialic acid receptors is crucial for routing the virus to the ER. This is in  
523 line with previous work indicating that branched sialylated glycosphingolipids targets  
524 murine polyomavirus (mPyV) and SV40 from endolysosomes to the ER (36, 48, 80,  
525 93). The role of HSPGs remains less clear. It may be that MCPyV interacts with  
526 sulfated GAGs simply, because they may serve as an initial high affinity attachment  
527 factor, which facilitates later interaction with low affinity glycosphingolipids. An  
528 alternative mechanism may be the induction of a conformational change in the virus  
529 capsid upon GAG binding that may facilitate uncoating and transfer to the secondary  
530 receptor, as it has been described for HPV16, a virus with a similar tissue tropism  
531 (51, 94). However, such GAG-induced conformational changes have no precedent  
532 among other PyVs. Of note, JC PyV can utilize two distinct pathways for infectious  
533 internalization, where one depends on interaction with sulfated GAGs and the other  
534 relies on sialic acid binding, this effect could depend on the host cell type (88). As the  
535 niche(s) for MCPyV infection remain only partially understood, the role of HSPGs in  
536 MCPyV entry may thus depend on specific cell types that are being infected *in vivo*.

537

538 Receptor engagement leads to the endocytosis of MCPyV. In line with our initial  
539 hypothesis that infectious entry of MCPyV may follow a path similar to that of SV40,  
540 our inhibitory experiments showed that infectious entry was independent of clathrin  
541 and the activity Na<sup>+</sup>/H<sup>+</sup>-exchanger but required dynamin and cholesterol, as well as  
542 actin dynamics. Since MCPyV particles were not found in coated pits or membrane  
543 protrusions, entry does not involve CME or macropinocytosis. The combined  
544 requirements for dynamins, cholesterol and actin dynamics indicated endocytosis by  
545 caveolar/lipid raft mediated endocytosis. Dynamins are also involved in phagocytosis  
546 and endocytosis of interleukin-2 (IL-2), both of which also require actin and lipid

547 rafts/cholesterol (32). Phagocytosis occurs only in specialized cells and it is  
548 characterized by long outward protrusions that close around large cargos (95). Thus,  
549 an involvement of phagocytosis can be excluded similar to macropinocytosis. IL-2  
550 endocytosis, on the other hand, occurs into small, inward budding vesicles, which are  
551 mostly formed at the base of an outward protrusion (96). Such initial pits containing  
552 MCPyV can be found in the electron micrographs, however in the majority of cases,  
553 MCPyV is taken up into small vesicle from flat membrane regions, which makes IL-2-  
554 like endocytosis seem unlikely.

555

556 Caveolar/lipid raft-mediated endocytosis routes cargos into endosomal  
557 compartments (48, 97). We found MCPyV particles in high abundance in endosomal  
558 compartments resembling endosomes, lysosomes, multivesicular and lamellar  
559 bodies. We also observed small numbers of MCPyV virions in the ER. Retrograde  
560 trafficking from endosomes to the ER is a general mechanism employed by PyVs.  
561 The low frequency of ER-localized MCPyV virions is similar to prior observations of  
562 mPyV entry (93) and hints at a bottleneck for trafficking from endosomes to the ER.  
563 Murine PyV as well as JC and BK PyV have been shown to require acidic pH  
564 environments in the endolysosomal compartment presumably for a conformational  
565 change facilitating membrane penetration after translocation into the ER by a yet  
566 unknown mechanism (86, 98, 99). For MCPyV, acidification in the endolysosomal  
567 system may serve a similar role.

568

569 MCPyV infection is sensitive to DTT treatment (Fig. 1 C) and may therefore be  
570 dependent on the redox environment within the ER. In analogy to SV40, uncoating  
571 and membrane translocation to the cytoplasm may occur in the ER with the help of  
572 the ERAD machinery and cytoplasmic chaperones (39, 40).

573

574 As a final step, the viral genome must be delivered to the nucleus, which is the site of  
575 early gene expression and replication for PyV. Interestingly, we found that MCPyV  
576 infection was sensitive to cell cycle block in S-phase, which indicates that mitosis is  
577 required for completion of MCPyV entry. Previous work on HPV16 identified its  
578 dependence on mitotic activity of the target cells, which allows delivery of the viral  
579 genome to the nucleus upon nuclear envelope breakdown (77, 100). However, SV40  
580 has been described to enter the nucleus of interphase cells through the nuclear pore  
581 complex by making use of nuclear localisation signals in the viral capsid proteins  
582 after ERAD-dependent partial disassembly (40, 101-103). It remains thus unclear,  
583 why MCPyV target cells actively progressing through the cell cycle. Nevertheless, our  
584 findings are in line with the importance of WNT signalling during infection of dermal  
585 fibroblasts (25).

586

587 To our surprise, we regularly observed enveloped particles in endosomal  
588 compartments. It remains unclear when and how these virions acquire a  
589 membraneous envelope, whether this reflects an antiviral mechanism or whether it is  
590 part of the infectious entry mechanisms. It is conceivable that MCPyV uses the  
591 ESCRT machinery that generates intraluminal vesicles (ILVs) in multivesicular bodies  
592 (104). Alternatively, it may wrap itself in a membrane within the late  
593 endosomal/lysosomal compartment. The membrane could theoretically shield the  
594 virus from hydrolases, and may give it the time to persist until infection can be  
595 completed e.g. by progression through the cell cycle. Alternatively, these enveloped  
596 virus particles might arise through an unknown antiviral mechanism. Future studies  
597 will address the relevance of such enveloped particles for the infectious route.

598



599 In the light of our experiments and previous reports (28, 30), we propose that MCPyV  
600 attachment and internalization, at least in the model A549 cell line, is mediated by  
601 HS-type GAGs but that additional sialic acid binding is essential to route the  
602 internalized virus to the productive infection pathway of retrograde ER trafficking.  
603 However, entry into the ER seems to be a bottleneck for infections.

604

605

## 606 **Materials and Methods**

### 607 **Cell lines, antibodies, and reagents**

608 HeLa cells were from ATCC. A549 cells were a kind gift from C. Buck (NIH, National  
609 Cancer Institute, Bethesda, MD, USA). CV1 cells were a kind gift from J. Kartenbeck  
610 (DKFZ, Heidelberg, Germany). BHK Helsinki cells were a kind gift from A. Helenius  
611 (ETH Zürich, Switzerland). 293TT cells were a kind gift from J. Schiller (NIH, National  
612 Cancer Institute, Bethesda, MD, USA). Aphidicolin, EIPA, cytochalasin D,  
613 nocodazole, nystatin, NH<sub>4</sub>Cl, NaClO<sub>3</sub>, heparin, and sodium orthovanadate were from  
614 Sigma-Aldrich. Bafilomycin A1, genistein, progesterone were from Applichem.  
615 Brefeldin A, cyclosporine A, jasplakinolide, okadaic acid were from Calbiochem.  
616 Dynasore was from Merck. Pitstop2 was from Abcam. RedDot2 was from VWR.

617

### 618 **Viruses**

619 MCPyV pseudoviruses (PsV) containing a GFP reporter plasmid (MCPyV-GFP) were  
620 produced by transfection of 293TT cells with pwM2m, ph2m and phGluc as described  
621 previously (105, 106). In brief, 293TT cells were transfected with the indicated  
622 plasmids. After 48 h, cells were harvested and lysed. For optimal maturation, lysates  
623 were incubated for further 24 h with 25 mM ammonium sulfate (pH 9.0) (107).  
624 MCPyV PsVs were purified on a 25%-39% linear OptiPrep gradient (Sigma-Aldrich).  
625 HPV16 pseudoviruses containing a GFP reporter plasmid (HPV16-GFP) were  
626 produced by transfection of 293TT cells with p16SheLL and pCIneo as described  
627 previously (105, 106). The procedure was similar to MCPyV production above.  
628 SV40 and SFV were produced as described previously (40, 108).

629

### 630 **Infection assays upon inhibitor treatment**

631 Infection assays with MCPyV, HPV16, and SV40 were conducted in 96well plates,  
632 where 3000 or 10000 A549 cells were seeded in RPMI (5% FCS and 2 mM  
633 glutamine) at least 6 h prior to infection. Cells were treated with 80  $\mu$ L of the following  
634 inhibitors at the indicated concentrations diluted in RPMI (5% FCS, 2 mM glutamine)  
635 or SV40 infection medium (RPMI with 3% BSA, 10 mM HEPES, pH 6.8): overnight  
636 preincubation - nystatin/progesterone, sodium chlorate, and toxin B; 30 min  
637 preincubation – bafilomycin A1, brefeldin A, cytochalasin D, dithiotreitol, dynasore,  
638 EIPA, genistein, jasplakinolide,  $\text{NH}_4\text{Cl}$ , nocodazole, okadaic acid, pitstop2, sodium  
639 orthovanadate, wortmannin. Virus was diluted in RPMI (5% FCS, 2 mM glutamine) or  
640 SV40 infection medium and 20  $\mu$ L of the inoculum were added to each well. MCPyV  
641 samples were incubated for 30 h until the inhibitor dilutions were exchanged to RPMI  
642 containing 10 mM  $\text{NH}_4\text{Cl}$  and 10 mM HEPES, pH 7.4 and incubated for further 42 h.  
643 Samples were fixed by addition of a final 4% paraformaldehyde (PFA) to the wells.  
644 Nuclei were stained with RedDot2. Infection scored by analysis of GFP expression by  
645 microscopy (Zeiss Axio Observer Z1 equipped with a Yokogawa CSU22 spinning  
646 disc module and a CoolSnap HQ camera; Visitron Systems GmbH). Infection with  
647 HPV16 was similar to MCPyV but for the exchange of medium to DMEM containing  
648 10 mM  $\text{NH}_4\text{Cl}$  and 10 mM HEPES, pH 7.4 occurred after 12 h post infection and  
649 fixation was done after total 48 h. SV40 inoculum was replaced by fresh DMEM  
650 containing 5 mM DTT after 10 h incubation until fixation after 24 h. Cells were  
651 incubated with SFV for 4 h until fixation. Samples were fixed as above. For detection  
652 of infection, SV40 and SFV samples were stained with an anti-LTag antibody (sc-  
653 20800) or SFV glycoprotein antibody (110), respectively, and an AF488-coupled  
654 secondary antibody; subsequently nuclei were stained with RedDot2. Infection was  
655 scored by microscopy (Zeiss Axio Observer Z1 equipped with a Yokogawa CSU22  
656 spinning disc module and a CoolSnap HQ camera; Visitron Systems GmbH). Cell

657 numbers and infection indices were determined by using the MatLab script Infection  
658 Counter as described before (40, 48).

659 Alternatively, the effects of single inhibitors on MCPyV and control virus infection  
660 were tested in a flow cytometry-based assay. Here,  $3 \times 10^4$  A549 cells were seeded in  
661 24-well plates or  $5 \times 10^4$  HeLa cells in 12-well plates or  $2.5 \times 10^5$  BHK Helsinki cells in  
662 12-well plates 6-8 h prior to treatment with aphidicolin over night. The compound was  
663 renewed before cells were infected with MCPyV, HPV or SFV, respectively.  
664 Aphidicolin was renewed daily until fixation of the cell at 72 h p.i. by trypsinization  
665 and subsequent addition of 4% paraformaldehyde. The percentage of GFP-positive  
666 cells was measured by flow cytometry using a BD FACScalibur.

667

### 668 **Electron microscopy**

669 For negative staining EM of virus particles, about  $8 \times 10^6$  PsV in PBS/0.8M NaCl were  
670 absorbed for 5 min on formvar coated, carbon sputtered grids. Particles were  
671 contrasted for 7 min with 1% phosphotungstic acid. Samples were analyzed directly  
672 after drying. The sample was analyzed at 80 kV on a FEI-Tecnai 12 electron  
673 microscope (FEI, Eindhoven, Netherlands). Images of selected areas were  
674 documented with Olympus Veleta 4k CCD camera.

675 For ultrathin sectioning transmission EM, virus particles were added for 2 h, 8 h and  
676 16 h to A549 cells before fixation with 2.5% glutaraldehyde in PBS. Samples were  
677 post-fixed with 0.5% OsO<sub>4</sub>, block stained with 0.5% uranyl acetate and after  
678 dehydration embedded in Epoxyresin. 60nm ultrathin sections were cut and  
679 counterstained with uranyl acetat and lead. Images of selected areas were  
680 documented with Olympus Veleta 4k CCD camera.

681

### 682 **NMR spectroscopy**

683 NMR experiments were conducted at 283 K using a 600 MHz Bruker Avance  
684 spectrometer equipped with a TXI triple resonance room temperature probe head. 3  
685 mm I.D. NMR tubes with 200  $\mu$ L sample volume were used. Each sample contained  
686 55.6 nM MCPyV VLPs (i.e. 20  $\mu$ M of the major capsid protein VP1) - either wild-type  
687 or mutant - and 1 mM oligosaccharide (either 3'SL or the Arixtra GAG-  
688 pentasaccharide). Prior to NMR sample preparation, VLPs were dialysed in Slide-A-  
689 Lyzer MINI dialysis devices (Thermo Fisher Scientific) against 150 mM NaCl, 1 mM  
690  $\text{CaCl}_2$ , pH 6.0 in  $\text{D}_2\text{O}$ . 3'SL (Carbosynth) was added from a 40 mM stock solution  
691 prepared in pure  $\text{D}_2\text{O}$  and Arixtra was added from a 7.2 mM stock solution in 150 mM  
692 NaCl, 1 mM  $\text{CaCl}_2$ , pH 6.0 in  $\text{D}_2\text{O}$ , dialysed from ready-to-inject syringes (Aspen).  
693 For 3'SL-containing samples, off- and on-resonance frequencies in STD-NMR  
694 experiments were set to -30 ppm and 7.3 ppm, respectively, while -30 ppm and -0.5  
695 ppm were used for Arixtra-containing samples, owing to the different chemical shift  
696 ranges of both glycans. The irradiation power of the selective pulses was set to 57  
697 Hz. The saturation time was 2 s and a total relaxation delay of 3 s was used. A 50-ms  
698 continuous-wave spin-lock pulse with a strength of 3.2 kHz was employed to  
699 suppress residual protein signals. A total number of 512 scans and a total number of  
700 10,000 points were collected and spectra were multiplied with a Gaussian window  
701 function prior to Fourier transformation.

702

### 703 **MCPyV VLP preparation for NMR spectroscopy**

704 MCPyV VLPs were produced essentially according to a published protocol (111). The  
705 pwM and ph2m vectors coding for MCPyV VP1 and VP2, respectively, ((27), see also  
706 [www.addgene.org](http://www.addgene.org)) were used at a 5:1 ratio for transfection of 293 TT cells. OptiPrep  
707 was omitted during the purification and replaced with two CsCl density gradient  
708 centrifugation steps.

709

## 710 **Acknowledgements**

711 We would like to thank N. Cordes and E. Weghake (Cellular Virology, Münster,  
712 Germany) for technical support during virus production and infection experiments.  
713 Thanks also to members of the Schelhaas laboratory for helpful comments on this  
714 manuscript. This work was supported by funding to MS by the German Research  
715 Foundation (DFG EXC 1003 (partly)) and within the InfectERA initiative by funding  
716 from the Federal Ministry for Education and Research (BMBF, 031L0095A). Further  
717 support from the DFG to BSB is also acknowledged (1294/3-1 belonging to FOR2328  
718 'Virocarb').

719

## 720 **Figure legends**

721

722 **Figure 1: MCPyV infection is slow and asynchronous, and relies on interaction**  
723 **with sulfated glycans.** (A) A549, HeLa or HaCaT cells were infected with increasing  
724 amounts of MCPyV PsV. Depicted are relative infection values (%) related to the  
725 MCPyV amount yielding 20% absolute infection in A549 cells  $\pm$  SD (1x = 80 ng VP1).  
726 (B) A549, CV-1 or HeLa cells were infected with MCPyV, SV40 or HPV16,  
727 respectively, in the presence of indicated concentrations of  $\text{NH}_4\text{Cl}$ . (C) A549, CV-1 or  
728 BHK cells were infected with MCPyV, SV40 or SFV, respectively, in the presence of  
729 indicated concentrations of DTT. (D) A549 cells were infected with MCPyV for total  
730 72 h, while 10 mM  $\text{NH}_4\text{Cl}$  or 5 mM DTT was added at indicated h p.i.. (E) A549, CV-1  
731 or HeLa cells were infected with MCPyV, SV40 or HPV16, respectively, upon  
732 pretreatment with indicated concentrations of  $\text{NaClO}_3$  for 16 h prior to infection. (F)  
733 A549 were infected with MCPyV or IAV, and HeLa cells were infected with HPV16  
734 virions, which were treated with indicated concentrations of heparin for 1 h prior to

735 infection. (B-F) Depicted are averages of relative infection values to untreated  
736 controls  $\pm$  SD from at least 3 independent experiments.

737

738 **Figure 2: MCPyV infection is dynamin- and cholesterol-dependent, but**  
739 **independent from clathrin and Na<sup>+</sup>/H<sup>+</sup>-exchangers.** (A) A549, CV-1 or BHK cells  
740 were infected with MCPyV, SV40 or SFV, respectively, in the presence of indicated  
741 concentrations of pitstop2. (B-D) A549, CV-1 or HeLa cells were infected with  
742 MCPyV, SV40 or HPV16, respectively, in the presence of indicated concentrations of  
743 dynasore (B), nystatin/progesterone (C), and EIPA (D). Depicted are percentages of  
744 infection values relative to solvent treated controls  $\pm$  SD of at least 3 independent  
745 experiments.

746

747 **Figure 3: MCPyV infection is dependent on actin, RhoGTPases, tyr-kinases,**  
748 **and cellular phosphatases.** (A-B) A549, CV-1 or BHK cells were infected with  
749 MCPyV, SV40 or SFV, respectively, in the presence of indicated concentrations of  
750 cytochalasin D (A) or jasplakinolide (B). (C-F) A549, CV-1 or HeLa cells were  
751 infected with MCPyV, SV40 or HPV16, respectively, in the presence of indicated  
752 concentrations of toxin B (C), genistein (D), sodium orthovanadate (E), or okadaic  
753 acid (F). Depicted are percentages of infection values relative to solvent treated  
754 controls  $\pm$  SD of at least 3 independent experiments.

755

756 **Figure 4: MCPyV infection requires endosomal acidification, functional**  
757 **microtubular dynamics, and an intact redox environment.** (A-C) A549, CV-1 or  
758 HeLa cells were infected with MCPyV, SV40 or HPV16, respectively, in the presence  
759 of indicated concentrations of bafilomycin A (A), nocodazol (B), and brefeldin A (C).  
760 A549, BHK, or HeLa cells were infected with MCPyV, SFV or HPV16 respectively, in

761 the presence of indicated concentrations of aphidicolin (D). Depicted are percentages  
762 of infection values relative to solvent treated controls  $\pm$  SD of at least 3 independent  
763 experiments.

764

765 **Figure 5: MCPyV is taken up into tight-fitting inward budding pits.** (A-C) A549  
766 cells were infected with MCPyV particles for 2-24 h before fixation with  
767 glutaraldehyde. Cells were processed for TEM according to standard procedures.  
768 Images of early entry events were taken. Scale bar 100 nm.

769

770 **Figure 6: MCPyV travels through the endolysosomal system to the ER omitting**  
771 **the Golgi.** (A-D) A549 cells were infected with MCPyV particles for 2-24 h before  
772 fixation with glutaraldehyde. Cells were processed for TEM according to standard  
773 procedures. Virus particles were found in endosomal compartments (A, B) and in the  
774 ER (C). MCPyV was absent from the Golgi (D). Scale bar 100 nm.

775

776 **Figure 7: MCPyV virions acquire a membrane envelope during cell entry.** (A-C)  
777 A549 cells were infected with wild-type MCPyV particles before fixation with  
778 glutaraldehyde. Cells were processed for TEM according to standard procedures.  
779 Images of virus particles in intracellular compartments were taken after 8 h and 16 h  
780 p.i.. Note the envelope around the virus particles in the representative endosomal  
781 compartments. C) Note that enveloped particles (black arrows) are found side-by-  
782 side with non-enveloped virions (white arrow) in the same organelle. Scale bars 100  
783 nm; Scale bar inset 50 nm.

784

785 **Figure 8: MCPyV sialic acid binding mutants are taken up into A549 cells but**  
786 **fail to mediate infection.** (A-C i) MCPyV wild-type and mutant particles were



787 analyzed by electron microscopy after negative staining. Depicted are representative  
788 images of virions. Scale bars: 50 nm. (B-C ii and iii) A549 cells were infected with  
789 W76A and Y81V MCPyV particles for 2-24 h before fixation with glutaraldehyde.  
790 Cells were processed for TEM according to standard procedures. Images of virus  
791 particles in endocytic pits and in intracellular compartments were taken after 8 h (ii)  
792 and 16 h p.i. (iii), respectively. Scale bar 100 nm for ii and 200 nm for iii. (D) 60 ng  
793 (1x), 300 ng (5x) and 600 ng (10x) of MCPyV wild-type and W76A and Y81V mutant  
794 particles were used in an infection assay with A549 cells for 72 h.

795

796 **Figure 9: MCPyV sialic acid binding mutants are capable of GAG binding.** A)  
797 STD-NMR difference spectra of MCPyV VLPs with 3'sialyllactose (3'SL) and  
798 reference spectra. From top to bottom: i) VLP  $^1\text{H}$  1D reference spectrum; ii) STD-  
799 NMR spectrum of WT VLPs with 3'SL exhibiting saturation transfer from the capsid to  
800 3'SL; iii) same spectrum for Y81V mutant VLPs; iv) same spectrum with W76A  
801 mutant VLPs showing no transfer to 3'SL; v) 3'SL  $^1\text{H}$  1D spectrum for comparison.  
802 Small molecule impurities are observed in the VLP preparation (i and iv), some of  
803 which are buffer components (sharp resonances with asterisks), others are  
804 unidentified molecules that are likely associated with the capsids (broad resonances  
805 with asterisks, the peak broadening suggests slow molecular tumbling, i.e.  
806 association with the VLPs). HDO signals were truncated for the sake of visibility. B)  
807 STD-NMR difference spectra of MCPyV VLPs with a GAG pentasaccharide (Arixtra,  
808 Ax) and reference spectra. From top to bottom: i) VLP  $^1\text{H}$  1D reference spectrum; ii)  
809 STD-NMR spectrum of WT VLPs with pentasaccharide exhibiting saturation transfer  
810 from the capsid to the GAG; iii) same spectrum with W76A mutant VLPs; iv) GAG  $^1\text{H}$   
811 1D spectrum for comparison. Saturation transfer to the GAG is observed for the WT

812 and the W76A mutant that does not bind to 3'SL (Fig. 8 A iv). HDO signals were  
813 truncated for the sake of visibility.

814

## 815 **References**

816

- 817 1. **Gjoerup O, Chang Y.** 2010. Update on Human Polyomaviruses and Cancer.  
818 *Advances in Cancer Research* **106**:1-51.
- 819 2. **Moens U, Calvignac-Spencer S, Lauber C, Ramqvist T, Feltkamp MCW,**  
820 **Daugherty MD, Verschoor EJ, Ehlers B, Ictv Report C.** 2017. ICTV Virus  
821 Taxonomy Profile: Polyomaviridae. *J Gen Virol* **98**:1159-1160.
- 822 3. **Gross L.** 1953. A filterable agent, recovered from Ak leukemic extracts,  
823 causing salivary gland carcinomas in C3H mice. *Proc Soc Exp Biol Med*  
824 **83**:414-421.
- 825 4. **Eddy BE, Borman GS, Grubbs GE, Young RD.** 1962. Identification of the  
826 oncogenic substance in rhesus monkey kidney cell cultures as simian virus  
827 40. *Virology* **17**:65-75.
- 828 5. **Chang Y, Moore PS.** 2012. Merkel cell carcinoma: a virus-induced human  
829 cancer. *Annu Rev Pathol* **7**:123-144.
- 830 6. **DeCaprio JA, Garcea RL.** 2013. A cornucopia of human polyomaviruses. *Nat*  
831 *Rev Microbiol* **11**:264-276.
- 832 7. **Gardner S, Field A, Coleman D, Hulme B.** 1971. New Human Papovavirus  
833 (B.K.) Isolated from Urine after Renal Transplantation. *The Lancet* **297**:1253-  
834 1257.
- 835 8. **Padgett B, Zurhein G, Walker D, Eckroade R, Dessel B.** 1971. Cultivation of  
836 Papova-Like Virus from Human Brain with Progressive Multifocal  
837 Leucoencephalopathy. *The Lancet* **297**:1257-1260.

- 838 9. **Kean JM, Rao S, Wang M, Garcea RL.** 2009. Seroepidemiology of human  
839 polyomaviruses. *PLoS Pathog* **5**:e1000363.
- 840 10. **Stolt A, Sasnauskas K, Koskela P, Lehtinen M, Dillner J.** 2003.  
841 Seroepidemiology of the human polyomaviruses. *J Gen Virol* **84**:1499-1504.
- 842 11. **Walker DL, Padgett BL.** 1983. The epidemiology of human polyomaviruses.  
843 *Prog Clin Biol Res* **105**:99-106.
- 844 12. **Feng H, Shuda M, Chang Y, Moore PS.** 2008. Clonal integration of a  
845 polyomavirus in human Merkel cell carcinoma. *Science* **319**:1096-1100.
- 846 13. **Hodgson NC.** 2005. Merkel cell carcinoma: Changing incidence trends.  
847 *Journal of Surgical Oncology* **89**:1-4.
- 848 14. **Lemos B, Nghiem P.** 2007. Merkel cell carcinoma: more deaths but still no  
849 pathway to blame. *J Invest Dermatol* **127**:2100-2103.
- 850 15. **Engels EA, Frisch M, Goedert JJ, Biggar RJ, Miller RW.** 2002. Merkel cell  
851 carcinoma and HIV infection. *The Lancet* **359**:497-498.
- 852 16. **Locke FL, Rollison DE, Sondak VK.** 2015. Merkel cell carcinoma and  
853 immunosuppression: what we still need to know. *J Natl Cancer Inst* **107**.
- 854 17. **Hampras SS, Michel A, Schmitt M, Waterboer T, Kranz L, Gheit T, Fisher**  
855 **K, Sondak VK, Messina J, Fenske N, Cherpelis B, Tommasino M, Pawlita**  
856 **M, Rollison DE.** 2015. Merkel cell polyomavirus (MCV) T-antigen  
857 seroreactivity, MCV DNA in eyebrow hairs, and squamous cell carcinoma.  
858 *Infect Agent Cancer* **10**:35.
- 859 18. **Schowalter RM, Pastrana DV, Pumphrey KA, Moyer AL, Buck CB.** 2010.  
860 Merkel cell polyomavirus and two previously unknown polyomaviruses are  
861 chronically shed from human skin. *Cell Host Microbe* **7**:509-515.

- 862 19. **Pastrana DV, Pumphrey KA, Cuburu N, Schowalter RM, Buck CB.** 2010.  
863 Characterization of monoclonal antibodies specific for the Merkel cell  
864 polyomavirus capsid. *Virology* **405**:20-25.
- 865 20. **Spurgeon ME, Lambert PF.** 2013. Merkel cell polyomavirus: a newly  
866 discovered human virus with oncogenic potential. *Virology* **435**:118-130.
- 867 21. **Shuda M, Feng H, Kwun HJ, Rosen ST, Gjoerup O, Moore PS, Chang Y.**  
868 2008. T antigen mutations are a human tumor-specific signature for Merkel  
869 cell polyomavirus. *Proc Natl Acad Sci U S A* **105**:16272-16277.
- 870 22. **Li J, Wang X, Diaz J, Tsang SH, Buck CB, You J.** 2013. Merkel cell  
871 polyomavirus large T antigen disrupts host genomic integrity and inhibits  
872 cellular proliferation. *J Virol* **87**:9173-9188.
- 873 23. **Houben R, Shuda M, Weinkam R, Schrama D, Feng H, Chang Y, Moore**  
874 **PS, Becker JC.** 2010. Merkel cell polyomavirus-infected Merkel cell  
875 carcinoma cells require expression of viral T antigens. *J Virol* **84**:7064-7072.
- 876 24. **Shuda M, Kwun HJ, Feng H, Chang Y, Moore PS.** 2011. Human Merkel cell  
877 polyomavirus small T antigen is an oncoprotein targeting the 4E-BP1  
878 translation regulator. *J Clin Invest* **121**:3623-3634.
- 879 25. **Liu W, Yang R, Payne AS, Schowalter RM, Spurgeon ME, Lambert PF, Xu**  
880 **X, Buck CB, You J.** 2016. Identifying the Target Cells and Mechanisms of  
881 Merkel Cell Polyomavirus Infection. *Cell Host Microbe* **19**:775-787.
- 882 26. **Liu W, Krump NA, MacDonald M, You J.** 2018. Merkel Cell Polyomavirus  
883 Infection of Animal Dermal Fibroblasts. *J Virol* **92**.
- 884 27. **Pastrana DV, Tolstov YL, Becker JC, Moore PS, Chang Y, Buck CB.** 2009.  
885 Quantitation of human seroresponsiveness to Merkel cell polyomavirus. *PLoS*  
886 *Pathog* **5**:e1000578.

- 887 28. **Schwalter RM, Pastrana DV, Buck CB.** 2011. Glycosaminoglycans and  
888 sialylated glycans sequentially facilitate Merkel cell polyomavirus infectious  
889 entry. *PLoS Pathog* **7**:e1002161.
- 890 29. **Schwalter RM, Reinhold WC, Buck CB.** 2012. Entry tropism of BK and  
891 Merkel cell polyomaviruses in cell culture. *PLoS One* **7**:e42181.
- 892 30. **Neu U, Hengel H, Blaum BS, Schwalter RM, Macejak D, Gilbert M,**  
893 **Wakarchuk WW, Imamura A, Ando H, Kiso M, Arnberg N, Garcea RL,**  
894 **Peters T, Buck CB, Stehle T.** 2012. Structures of Merkel cell polyomavirus  
895 VP1 complexes define a sialic acid binding site required for infection. *PLoS*  
896 *Pathog* **8**:e1002738.
- 897 31. **Erickson KD, Garcea RL, Tsai B.** 2009. Ganglioside GT1b is a putative host  
898 cell receptor for the Merkel cell polyomavirus. *J Virol* **83**:10275-10279.
- 899 32. **Mercer J, Schelhaas M, Helenius A.** 2010. Virus entry by endocytosis. *Annu*  
900 *Rev Biochem* **79**:803-833.
- 901 33. **Doherty GJ, McMahon HT.** 2009. Mechanisms of endocytosis. *Annu Rev*  
902 *Biochem* **78**:857-902.
- 903 34. **Anderson HA, Chen Y, Norkin LC.** 1996. Bound simian virus 40 translocates  
904 to caveolin-enriched membrane domains, and its entry is inhibited by drugs  
905 that selectively disrupt caveolae. *Mol Biol Cell* **7**:1825-1834.
- 906 35. **Parton RG, Richards AA.** 2003. Lipid rafts and caveolae as portals for  
907 endocytosis: new insights and common mechanisms. *Traffic* **4**:724-738.
- 908 36. **Pelkmans L, Kartenbeck J, Helenius A.** 2001. Caveolar endocytosis of  
909 simian virus 40 reveals a new two-step vesicular-transport pathway to the ER.  
910 *Nat Cell Biol* **3**:473-483.
- 911 37. **Norkin LC, Anderson HA, Wolfrom SA, Oppenheim A.** 2002. Caveolar  
912 endocytosis of simian virus 40 is followed by brefeldin A-sensitive transport to

- 913 the endoplasmic reticulum, where the virus disassembles. *J Virol* **76**:5156-  
914 5166.
- 915 38. **Pho MT, Ashok A, Atwood WJ.** 2000. JC virus enters human glial cells by  
916 clathrin-dependent receptor-mediated endocytosis. *J Virol* **74**:2288-2292.
- 917 39. **Dupzyk A, Tsai B.** 2016. How Polyomaviruses Exploit the ERAD Machinery  
918 to Cause Infection. *Viruses* **8**:242.
- 919 40. **Schelhaas M, Malmstrom J, Pelkmans L, Haugstetter J, Ellgaard L,**  
920 **Grunewald K, Helenius A.** 2007. Simian Virus 40 depends on ER protein  
921 folding and quality control factors for entry into host cells. *Cell* **131**:516-529.
- 922 41. **Inoue T, Tsai B.** 2015. A nucleotide exchange factor promotes endoplasmic  
923 reticulum-to-cytosol membrane penetration of the nonenveloped virus simian  
924 virus 40. *J Virol* **89**:4069-4079.
- 925 42. **Geiger R, Andritschke D, Friebe S, Herzog F, Luisoni S, Heger T,**  
926 **Helenius A.** 2011. BAP31 and BiP are essential for dislocation of SV40 from  
927 the endoplasmic reticulum to the cytosol. *Nat Cell Biol* **13**:1305-1314.
- 928 43. **Walczak CP, Tsai B.** 2011. A PDI family network acts distinctly and  
929 coordinately with ERp29 to facilitate polyomavirus infection. *J Virol* **85**:2386-  
930 2396.
- 931 44. **Helenius A, Kartenbeck J, Simons K, Fries E.** 1980. On the entry of Semliki  
932 forest virus into BHK-21 cells. *J Cell Biol* **84**:404-420.
- 933 45. **Schelhaas M, Shah B, Holzer M, Blattmann P, Kuhling L, Day PM, Schiller**  
934 **JT, Helenius A.** 2012. Entry of human papillomavirus type 16 by actin-  
935 dependent, clathrin- and lipid raft-independent endocytosis. *PLoS Pathog*  
936 **8**:e1002657.
- 937 46. **Kuhling L, Schelhaas M.** 2014. Systematic analysis of endocytosis by  
938 cellular perturbations. *Methods Mol Biol* **1174**:19-46.

- 939 47. **Boron WF, De Weer P.** 1976. Intracellular pH transients in squid giant axons  
940 caused by CO<sub>2</sub>, NH<sub>3</sub>, and metabolic inhibitors. *J Gen Physiol* **67**:91-112.
- 941 48. **Engel S, Heger T, Mancini R, Herzog F, Kartenbeck J, Hayer A, Helenius**  
942 **A.** 2011. Role of endosomes in simian virus 40 entry and infection. *J Virol*  
943 **85**:4198-4211.
- 944 49. **Braakman I, Helenius J, Helenius A.** 1992. Manipulating disulfide bond  
945 formation and protein folding in the endoplasmic reticulum. *EMBO J* **11**:1717-  
946 1722.
- 947 50. **Safaiyan F, Kolset SO, Prydz K, Gottfridsson E, Lindahl U, Salmivirta M.**  
948 1999. Selective effects of sodium chlorate treatment on the sulfation of  
949 heparan sulfate. *J Biol Chem* **274**:36267-36273.
- 950 51. **Cerqueira C, Liu Y, Kuhling L, Chai W, Hafezi W, van Kuppevelt TH, Kuhn**  
951 **JE, Feizi T, Schelhaas M.** 2013. Heparin increases the infectivity of Human  
952 Papillomavirus type 16 independent of cell surface proteoglycans and induces  
953 L1 epitope exposure. *Cell Microbiol* **15**:1818-1836.
- 954 52. **Weis W, Brown JH, Cusack S, Paulson JC, Skehel JJ, Wiley DC.** 1988.  
955 Structure of the influenza virus haemagglutinin complexed with its receptor,  
956 sialic acid. *Nature* **333**:426-431.
- 957 53. **von Kleist L, Stahlschmidt W, Bulut H, Gromova K, Puchkov D,**  
958 **Robertson MJ, MacGregor KA, Tomilin N, Pechstein A, Chau N, Chircop**  
959 **M, Sakoff J, von Kries JP, Saenger W, Krausslich HG, Shupliakov O,**  
960 **Robinson PJ, McCluskey A, Haucke V.** 2011. Role of the clathrin terminal  
961 domain in regulating coated pit dynamics revealed by small molecule  
962 inhibition. *Cell* **146**:471-484.
- 963 54. **Doxsey SJ, Brodsky FM, Blank GS, Helenius A.** 1987. Inhibition of  
964 endocytosis by anti-clathrin antibodies. *Cell* **50**:453-463.

- 965 55. **Macia E, Ehrlich M, Massol R, Boucrot E, Brunner C, Kirchhausen T.**  
966 2006. Dynasore, a Cell-Permeable Inhibitor of Dynamin. *Developmental Cell*  
967 **10**:839-850.
- 968 56. **Pelkmans L, Puntener D, Helenius A.** 2002. Local actin polymerization and  
969 dynamin recruitment in SV40-induced internalization of caveolae. *Science*  
970 **296**:535-539.
- 971 57. **Neufeld EB, Cooney AM, Pitha J, Dawidowicz EA, Dwyer NK, Pentchev**  
972 **PG, Blanchette-Mackie EJ.** 1996. Intracellular Trafficking of Cholesterol  
973 Monitored with a Cyclodextrin. *Journal of Biological Chemistry* **271**:21604-  
974 21613.
- 975 58. **Rothberg KG, Heuser JE, Donzell WC, Ying Y-S, Glenney JR, Anderson**  
976 **RGW.** 1992. Caveolin, a protein component of caveolae membrane coats. *Cell*  
977 **68**:673-682.
- 978 59. **Metherall JE, Waugh K, Li H.** 1996. Progesterone Inhibits Cholesterol  
979 Biosynthesis in Cultured Cells: ACCUMULATION OF CHOLESTEROL  
980 PRECURSORS. *Journal of Biological Chemistry* **271**:2627-2633.
- 981 60. **Koivusalo M, Welch C, Hayashi H, Scott CC, Kim M, Alexander T, Touret**  
982 **N, Hahn KM, Grinstein S.** 2010. Amiloride inhibits macropinocytosis by  
983 lowering submembranous pH and preventing Rac1 and Cdc42 signaling. *J*  
984 *Cell Biol* **188**:547-563.
- 985 61. **L'Allemain G, Paris S, Pouyssegur J.** 1984. Growth factor action and  
986 intracellular pH regulation in fibroblasts. Evidence for a major role of the  
987 Na<sup>+</sup>/H<sup>+</sup> antiport. *J Biol Chem* **259**:5809-5815.
- 988 62. **Brown SS, Spudich JA.** 1979. Cytochalasin inhibits the rate of elongation of  
989 actin filament fragments. *The Journal of cell biology* **83**:657-662.



- 990 63. **Bubb MR, Senderowicz AM, Sausville EA, Duncan KL, Korn ED.** 1994.  
991 Jasplakinolide, a cytotoxic natural product, induces actin polymerization and  
992 competitively inhibits the binding of phalloidin to F-actin. *The Journal of*  
993 *biological chemistry* **269**.
- 994 64. **Niedergang F, Chavrier P.** 2005. Regulation of phagocytosis by Rho  
995 GTPases. *Curr Top Microbiol Immunol* **291**:43-60.
- 996 65. **Mercer J, Helenius A.** 2009. Virus entry by macropinocytosis. *Nat Cell Biol*  
997 **11**:510-520.
- 998 66. **Just I, Fritz G, Aktories K, Giry M, Popoff MR, Boquet P, Hegenbarth S,**  
999 **von Eichel-Streiber C.** 1994. Clostridium difficile toxin B acts on the GTP-  
1000 binding protein Rho. *J Biol Chem* **269**:10706-10712.
- 1001 67. **Akiyama T, Ishida J, Nakagawa S, Ogawara H, Watanabe S, Itoh N,**  
1002 **Shibuya M, Fukami Y.** 1987. Genistein, a specific inhibitor of tyrosine-specific  
1003 protein kinases. *J Biol Chem* **262**:5592-5595.
- 1004 68. **Gordon JA.** 1991. Use of vanadate as protein-phosphotyrosine phosphatase  
1005 inhibitor. *Methods in Enzymology* **201**:477-482.
- 1006 69. **Huyer G, Liu S, Kelly J, Moffat J, Payette P, Kennedy B, Tsaprailis G,**  
1007 **Gresser MJ, Ramachandran C.** 1997. Mechanism of Inhibition of Protein-  
1008 tyrosine Phosphatases by Vanadate and Pervanadate. *Journal of Biological*  
1009 *Chemistry* **272**:843-851.
- 1010 70. **Bialojan C, Takai A.** 1988. Inhibitory effect of a marine-sponge toxin, okadaic  
1011 acid, on protein phosphatases. Specificity and kinetics. *Biochem J* **256**:283-  
1012 290.
- 1013 71. **Yoshimori T, Yamamoto A, Moriyamas Y, Futais M, Tashiroq Y.** 1991.  
1014 Bafilomycin AI, a Specific Inhibitor of Vacuolar-type H<sup>+</sup> -ATPase , Inhibits

- 1015            Acidification and Protein Degradation in Lysosomes of Cultured Cells. The  
1016            Journal of biological chemistry.
- 1017    72.    **Stebbing H.** 1995. Microtubule-based intracellular transport of organelles.  
1018            **2:113-140.**
- 1019    73.    **Cheung HT, Terry DS.** 1980. Effects of nocodazole, a new synthetic  
1020            microtubule inhibitor, on movement and spreading of mouse peritoneal  
1021            macrophages. *Cell Biol Int Rep* **4:1125-1129.**
- 1022    74.    **Fujiwara T, Oda K, Yokota S, Takatsuki A, Ikehara Y.** 1988. Brefeldin A  
1023            causes disassembly of the Golgi complex and accumulation of secretory  
1024            proteins in the endoplasmic reticulum. *J Biol Chem* **263:18545-18552.**
- 1025    75.    **Clever J, Yamada M, Kasamatsu H.** 1991. Import of simian virus 40 virions  
1026            through nuclear pore complexes. *Proc Natl Acad Sci U S A* **88:7333-7337.**
- 1027    76.    **Pyeon D, Pearce SM, Lank SM, Ahlquist P, Lambert PF.** 2009.  
1028            Establishment of human papillomavirus infection requires cell cycle  
1029            progression. *PLoS Pathog* **5:e1000318.**
- 1030    77.    **Aydin I, Weber S, Snijder B, Samperio Ventayol P, Kuhbacher A, Becker**  
1031            **M, Day PM, Schiller JT, Kann M, Pelkmans L, Helenius A, Schelhaas M.**  
1032            2014. Large scale RNAi reveals the requirement of nuclear envelope  
1033            breakdown for nuclear import of human papillomaviruses. *PLoS Pathog*  
1034            **10:e1004162.**
- 1035    78.    **Spadari S, Sala F, Pedrali-Noy G.** 1982. Aphidicolin: a specific inhibitor of  
1036            nuclear DNA replication in eukaryotes. *Trends in Biochemical Sciences* **7:29-**  
1037            **32.**
- 1038    79.    **Froshauer S, Kartenbeck J, Helenius A.** 1988. Alphavirus RNA replicase is  
1039            located on the cytoplasmic surface of endosomes and lysosomes. *The Journal*  
1040            *of Cell Biology* **107:2075-2086.**

- 1041 80. **Ewers H, Romer W, Smith AE, Bacia K, Dmitrieff S, Chai W, Mancini R,**  
1042 **Kartenbeck J, Chambon V, Berland L, Oppenheim A, Schwarzmann G,**  
1043 **Feizi T, Schwille P, Sens P, Helenius A, Johannes L.** 2010. GM1 structure  
1044 determines SV40-induced membrane invagination and infection. *Nat Cell Biol*  
1045 **12:11-18; sup pp 11-12.**
- 1046 81. **Kartenbeck J, Stukenbrok H, Helenius A.** 1989. Endocytosis of simian virus  
1047 40 into the endoplasmic reticulum. *J Cell Biol* **109:2721-2729.**
- 1048 82. **Kirkham M, Fujita A, Chadda R, Nixon SJ, Kurzchalia TV, Sharma DK,**  
1049 **Pagano RE, Hancock JF, Mayor S, Parton RG.** 2005. Ultrastructural  
1050 identification of uncoated caveolin-independent early endocytic vehicles. *J Cell*  
1051 *Biol* **168:465-476.**
- 1052 83. **Sabharanjak S, Sharma P, Parton RG, Mayor S.** 2002. GPI-anchored  
1053 proteins are delivered to recycling endosomes via a distinct cdc42-regulated,  
1054 clathrin-independent pinocytic pathway. *Dev Cell* **2:411-423.**
- 1055 84. **Bennett SM, Jiang M, Imperiale MJ.** 2013. Role of cell-type-specific  
1056 endoplasmic reticulum-associated degradation in polyomavirus trafficking. *J*  
1057 *Virology* **87:8843-8852.**
- 1058 85. **Nelson CD, Derdowski A, Maginnis MS, O'Hara BA, Atwood WJ.** 2012.  
1059 The VP1 subunit of JC polyomavirus recapitulates early events in viral  
1060 trafficking and is a novel tool to study polyomavirus entry. *Virology* **428:30-40.**
- 1061 86. **Querbes W, O'Hara BA, Williams G, Atwood WJ.** 2006. Invasion of host  
1062 cells by JC virus identifies a novel role for caveolae in endosomal sorting of  
1063 noncaveolar ligands. *J Virol* **80:9402-9413.**
- 1064 87. **Blaum BS, Neu U, Peters T, Stehle T.** 2018. Spin ballet for sweet  
1065 encounters: saturation-transfer difference NMR and X-ray crystallography

- 1066 complement each other in the elucidation of protein-glycan interactions. *Acta*  
1067 *Crystallogr F Struct Biol Commun* **74**:451-462.
- 1068 88. **Geoghegan EM, Pastrana DV, Schowalter RM, Ray U, Gao W, Ho M,**  
1069 **Pauly GT, Sigano DM, Kaynor C, Cahir-McFarland E, Combaluzier B,**  
1070 **Grimm J, Buck CB.** 2017. Infectious Entry and Neutralization of Pathogenic  
1071 JC Polyomaviruses. *Cell Rep* **21**:1169-1179.
- 1072 89. **Neu U, Maginnis MS, Palma AS, Stroh LJ, Nelson CD, Feizi T, Atwood**  
1073 **WJ, Stehle T.** 2010. Structure-function analysis of the human JC  
1074 polyomavirus establishes the LSTc pentasaccharide as a functional receptor  
1075 motif. *Cell Host Microbe* **8**:309-319.
- 1076 90. **Tsai B, Gilbert JM, Stehle T, Lencer W, Benjamin TL, Rapoport TA.** 2003.  
1077 Gangliosides are receptors for murine polyoma virus and SV40. *EMBO J*  
1078 **22**:4346-4355.
- 1079 91. **Payne CK, Jones SA, Chen C, Zhuang X.** 2007. Internalization and  
1080 trafficking of cell surface proteoglycans and proteoglycan-binding ligands.  
1081 *Traffic* **8**:389-401.
- 1082 92. **Sarrazin S, Lamanna WC, Esko JD.** 2011. Heparan sulfate proteoglycans.  
1083 *Cold Spring Harb Perspect Biol* **3**.
- 1084 93. **Qian M, Cai D, Verhey KJ, Tsai B.** 2009. A lipid receptor sorts polyomavirus  
1085 from the endolysosome to the endoplasmic reticulum to cause infection. *PLoS*  
1086 *Pathog* **5**:e1000465.
- 1087 94. **Cerqueira C, Samperio Ventayol P, Vogeley C, Schelhaas M.** 2015.  
1088 Kallikrein-8 proteolytically processes Human papillomaviruses in the  
1089 extracellular space to facilitate entry into host cells. *J Virol*  
1090 doi:10.1128/JVI.00234-15.

- 1091 95. **Aderem A, Underhill DM.** 1999. Mechanisms of phagocytosis in  
1092 macrophages. *Annu Rev Immunol* **17**:593-623.
- 1093 96. **Lamaze C, Dujeancourt A, Baba T, Lo CG, Benmerah A, Dautry-Varsat A.**  
1094 2001. Interleukin 2 receptors and detergent-resistant membrane domains  
1095 define a clathrin-independent endocytic pathway. *Mol Cell* **7**:661-671.
- 1096 97. **Pelkmans L, Burli T, Zerial M, Helenius A.** 2004. Caveolin-stabilized  
1097 membrane domains as multifunctional transport and sorting devices in  
1098 endocytic membrane traffic. *Cell* **118**:767-780.
- 1099 98. **Liebl D, Difato F, Hornikova L, Mannova P, Stokrova J, Forstova J.** 2006.  
1100 Mouse polyomavirus enters early endosomes, requires their acidic pH for  
1101 productive infection, and meets transferrin cargo in Rab11-positive  
1102 endosomes. *J Virol* **80**:4610-4622.
- 1103 99. **Eash S, Querbes W, Atwood WJ.** 2004. Infection of vero cells by BK virus is  
1104 dependent on caveolae. *J Virol* **78**:11583-11590.
- 1105 100. **Aydin I, Villalonga-Planells R, Greune L, Bronnimann MP, Calton CM,**  
1106 **Becker M, Lai KY, Campos SK, Schmidt MA, Schelhaas M.** 2017. A central  
1107 region in the minor capsid protein of papillomaviruses facilitates viral genome  
1108 tethering and membrane penetration for mitotic nuclear entry. *PLoS Pathog*  
1109 **13**:e1006308.
- 1110 101. **Nakanishi A, Clever J, Yamada M, Li PP, Kasamatsu H.** 1996. Association  
1111 with capsid proteins promotes nuclear targeting of simian virus 40 DNA. *Proc*  
1112 *Natl Acad Sci U S A* **93**:96-100.
- 1113 102. **Nakanishi A, Shum D, Morioka H, Otsuka E, Kasamatsu H.** 2002.  
1114 Interaction of the Vp3 nuclear localization signal with the importin alpha 2/beta  
1115 heterodimer directs nuclear entry of infecting simian virus 40. *J Virol* **76**:9368-  
1116 9377.

- 1117 103. **Nakanishi A, Li PP, Qu Q, Jafri QH, Kasamatsu H.** 2007. Molecular  
1118 dissection of nuclear entry-competent SV40 during infection. *Virus Res*  
1119 **124**:226-230.
- 1120 104. **Hanson PI, Cashikar A.** 2012. Multivesicular body morphogenesis. *Annu Rev*  
1121 *Cell Dev Biol* **28**:337-362.
- 1122 105. **Buck CB, Pastrana DV, Lowy DR, Schiller JT.** 2005. Generation of HPV  
1123 pseudovirions using transfection and their use in neutralization assays.  
1124 *Methods Mol Med* **119**:445-462.
- 1125 106. **Buck CB, Thompson CD, Pang YY, Lowy DR, Schiller JT.** 2005. Maturation  
1126 of papillomavirus capsids. *J Virol* **79**:2839-2846.
- 1127 107. **Cardone G, Moyer AL, Cheng N, Thompson CD, Dvoretzky I, Lowy DR,**  
1128 **Schiller JT, Steven AC, Buck CB, Trus BL.** 2014. Maturation of the Human  
1129 Papillomavirus 16 Capsid. *mBio* **5**.
- 1130 108. **Marsh M, Helenius A.** 1980. Adsorptive endocytosis of Semliki Forest virus. *J*  
1131 *Mol Biol* **142**:439-454.
- 1132 109. **Samperio Ventayol P, Schelhaas M.** 2015. Fluorescently Labeled Human  
1133 Papillomavirus Pseudovirions for Use in Virus Entry Experiments. *Curr Protoc*  
1134 *Microbiol* **37**:14B 14 11-22.
- 1135 110. **Vonderheit A, Helenius A.** 2005. Rab7 associates with early endosomes to  
1136 mediate sorting and transport of Semliki forest virus to late endosomes. *PLoS*  
1137 *Biol* **3**:e233.
- 1138 111. **Buck CB, Thompson CD.** 2007. Production of papillomavirus-based gene  
1139 transfer vectors. *Curr Protoc Cell Biol* **Chapter 26**:Unit 26 21.
- 1140

Figure 1

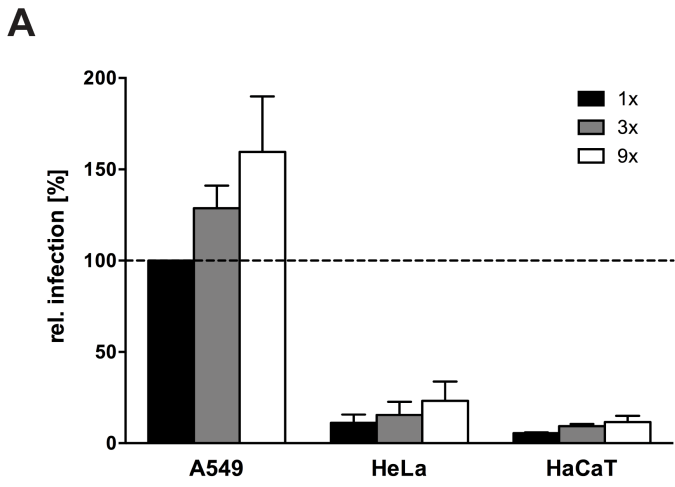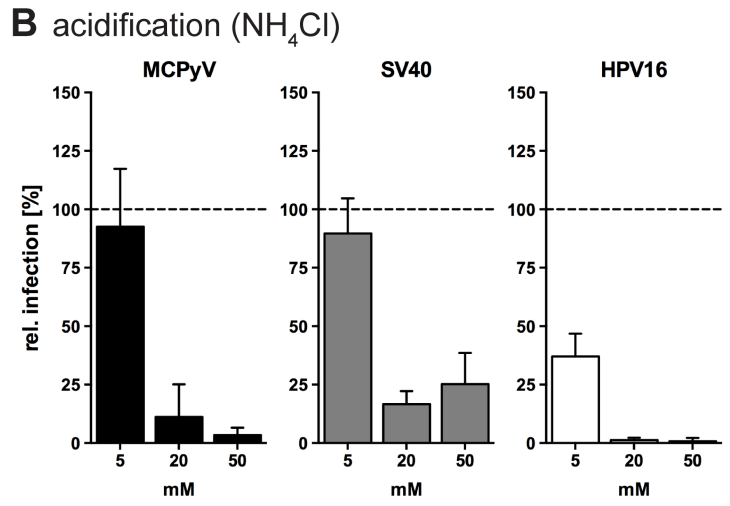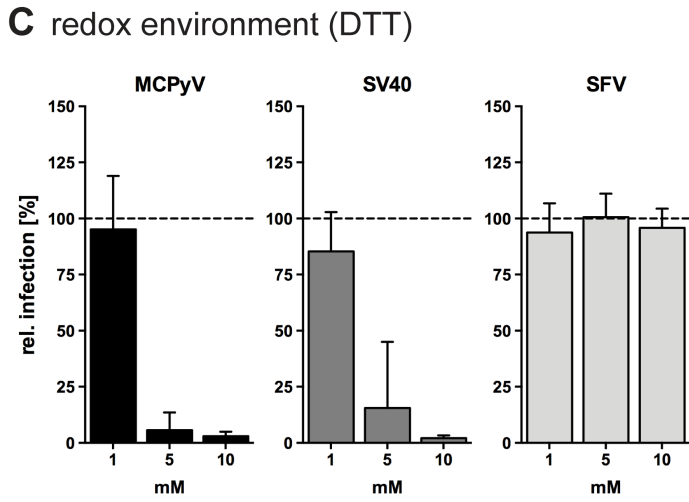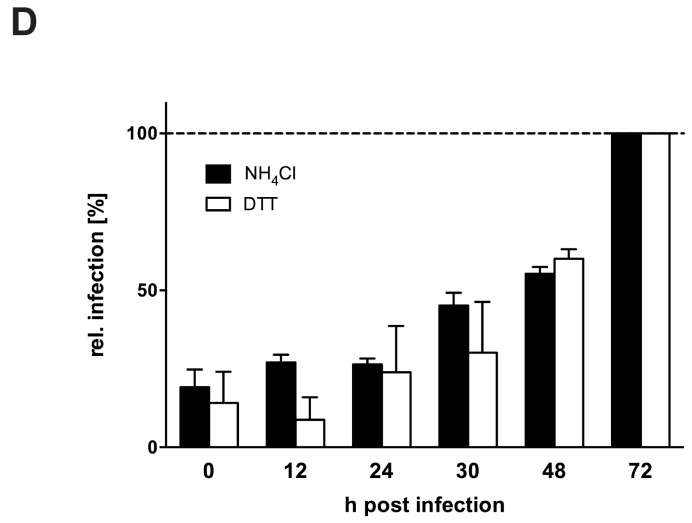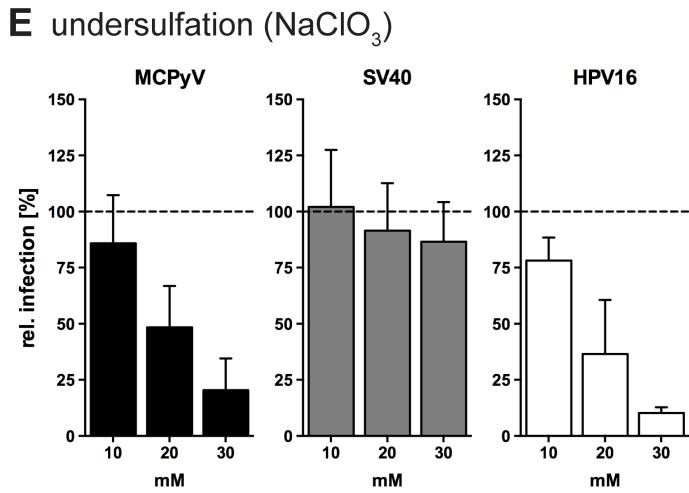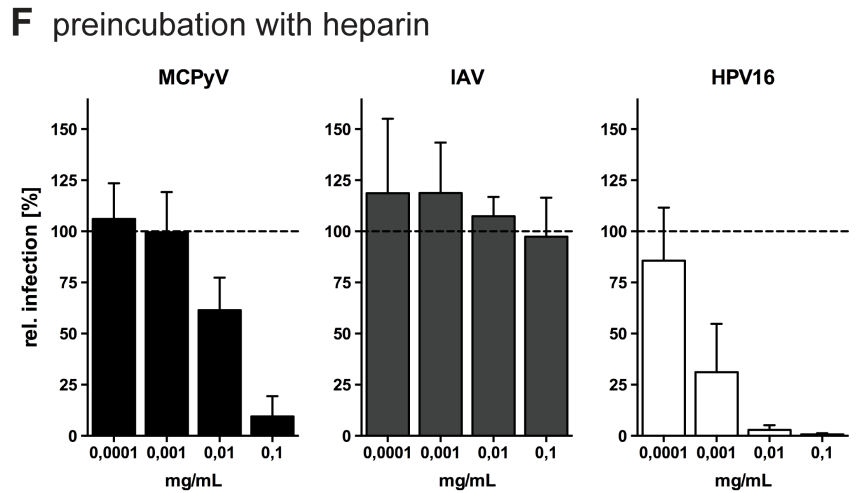

Figure 2

**A** clathrin (pitstop2)

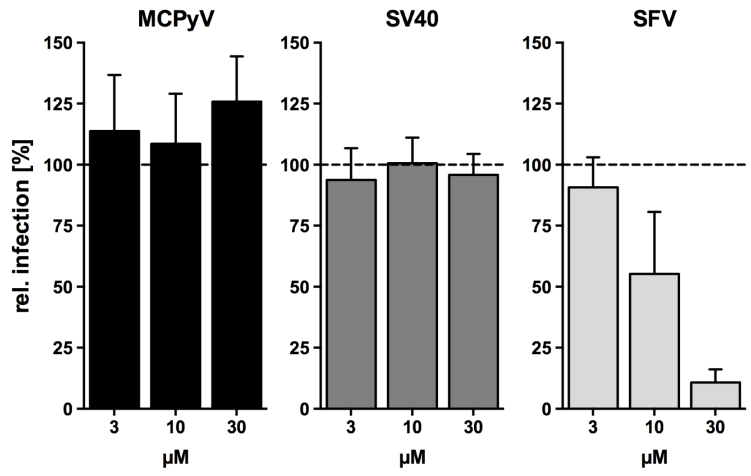

**B** dynamin-2 (dynasore)

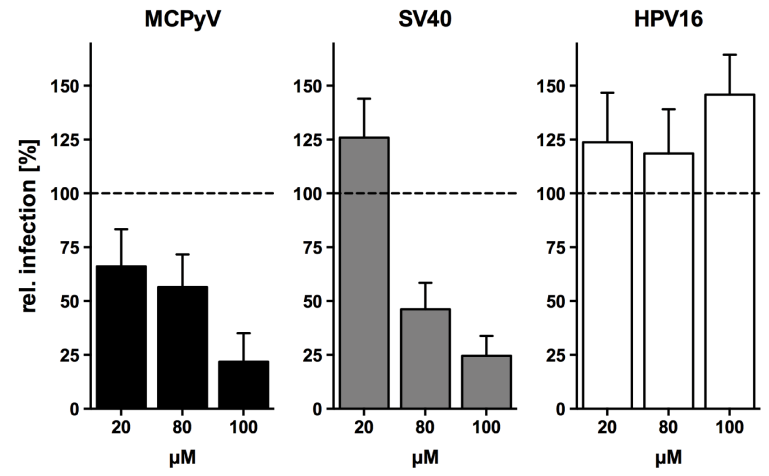

**C** cholesterol (nystatin/progesterone)

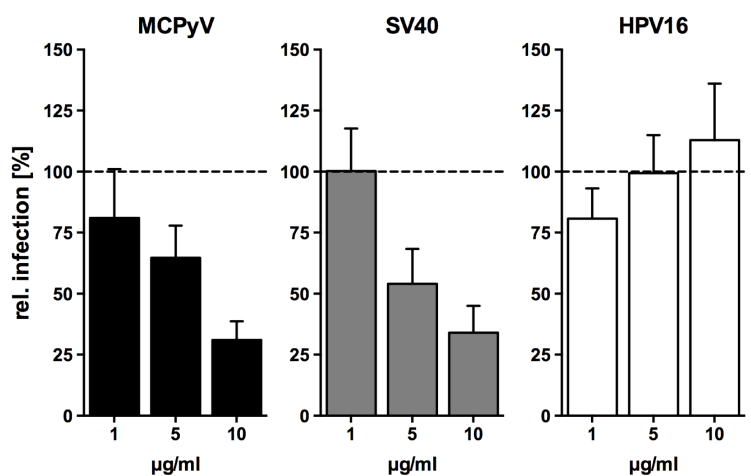

**D** Na<sup>+</sup>/H<sup>+</sup>-exchanger (EIPA)

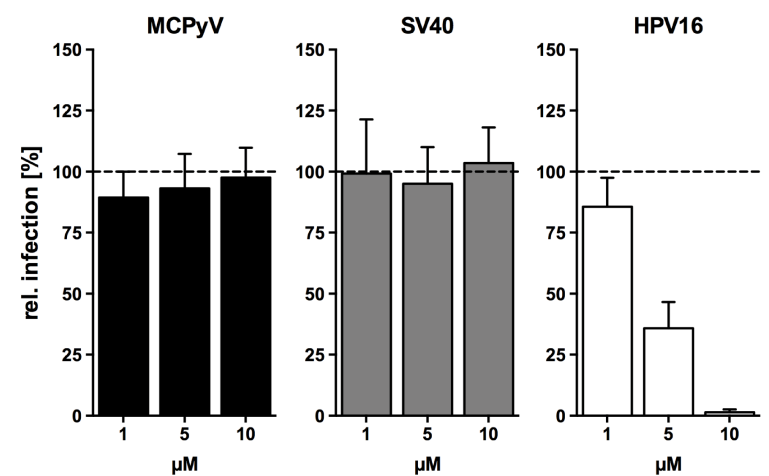



Figure 3

**A** actin (cytochalasin D)

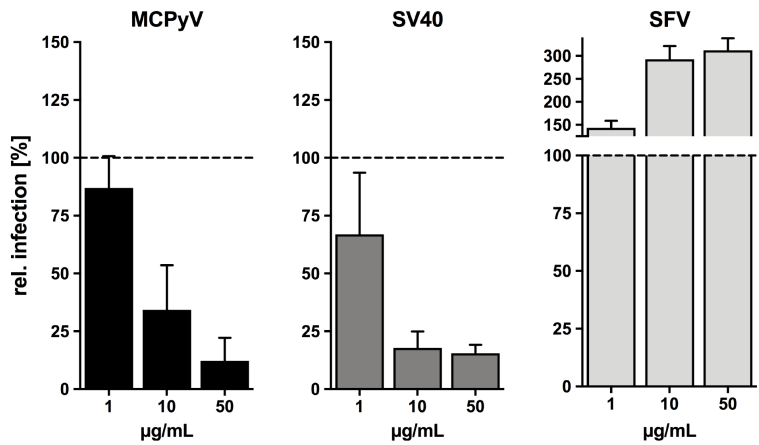

**B** actin (jasplakinolide)

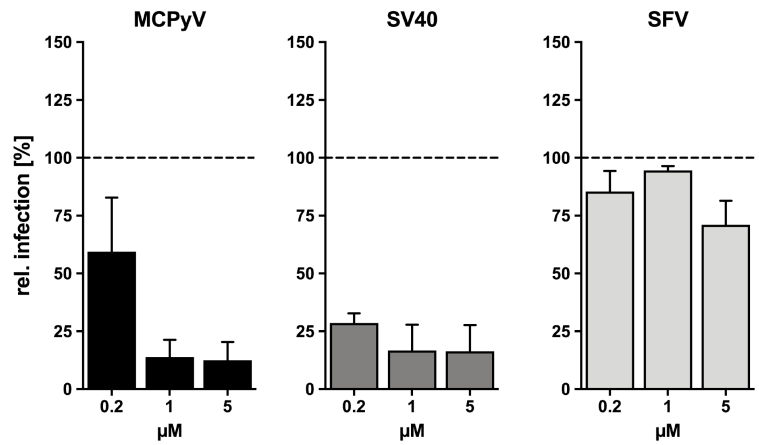

**C** Rho-like GTPases (toxin B)

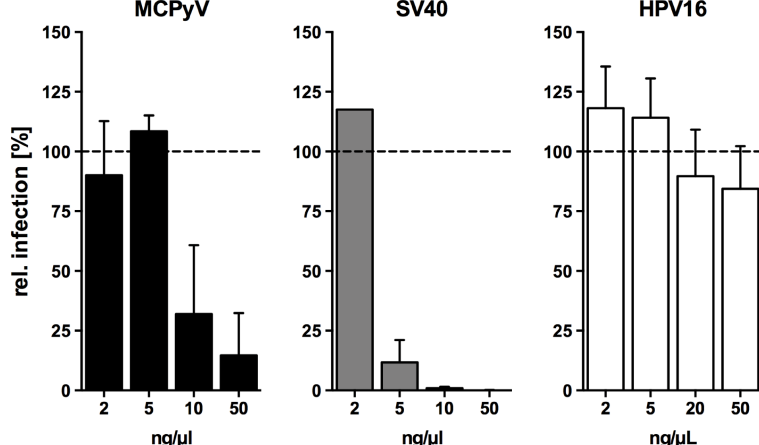

**D** Tyr-kinases (genistein)

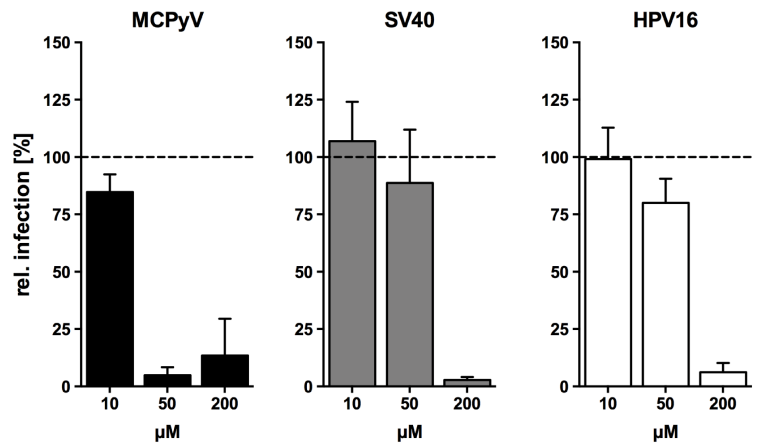

**E** phosphatases (sodium orthovanadate)

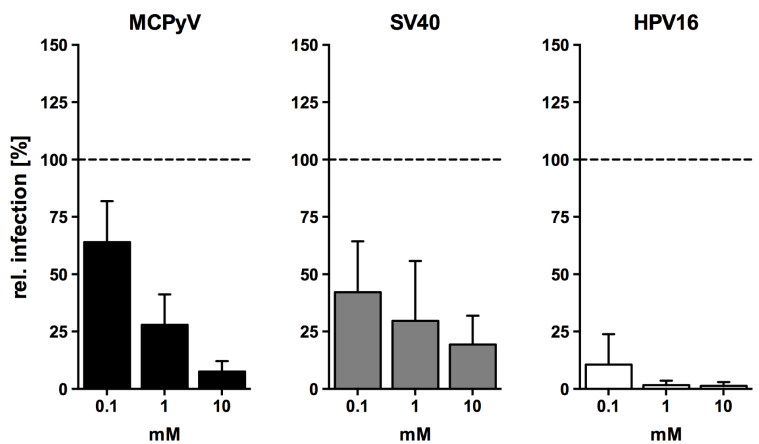

**F** PP1 and PP2A/B (okadaic acid)

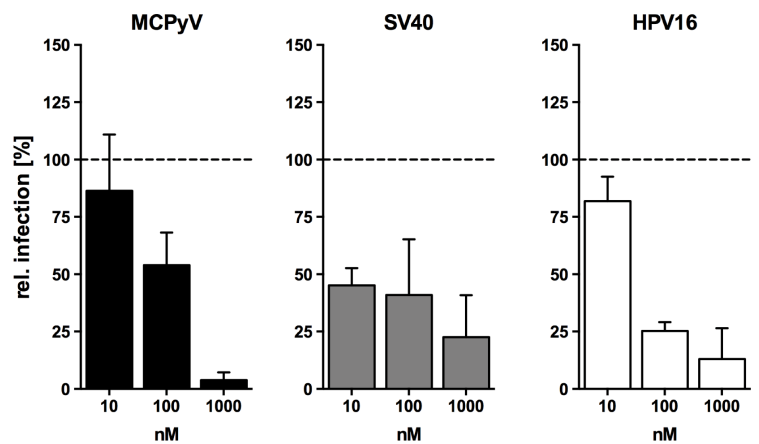

Figure 4

**A** endosomal acidification (bafilomycin A)

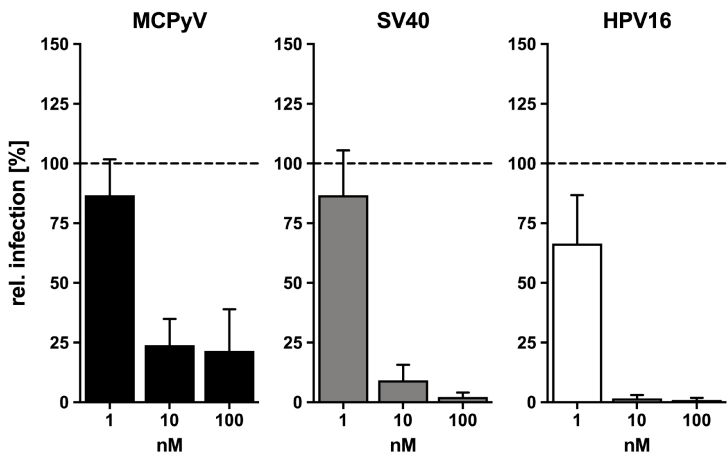

**B** microtubular transport (nocodazol)

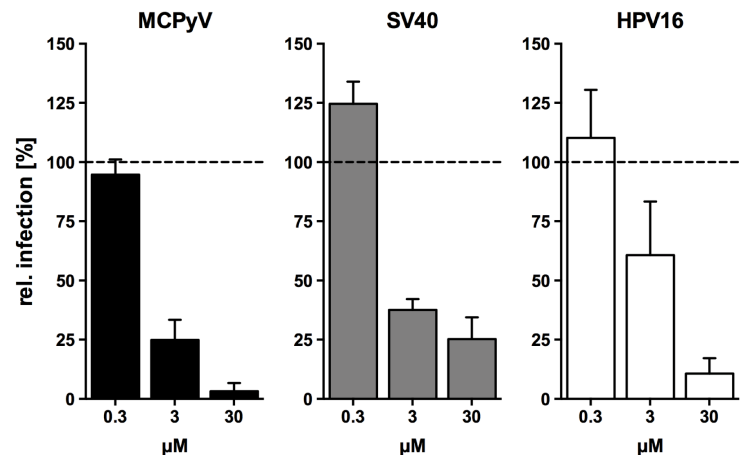

**C** Golgi collapse (brefeldin A)

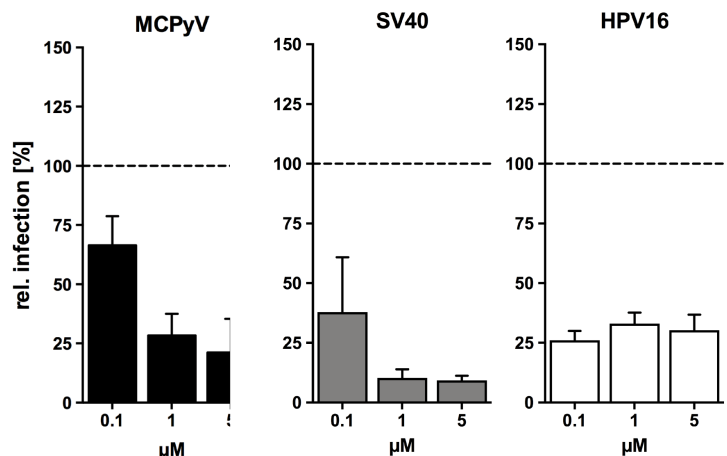

**D** cell cycle progression (aphidicolin)

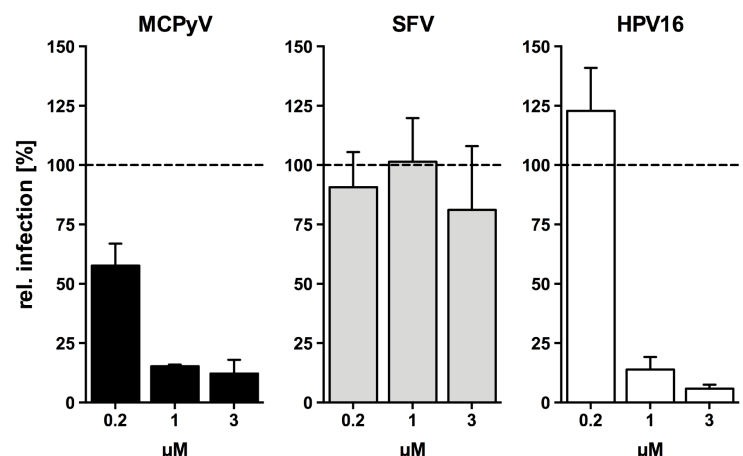

Figure 5

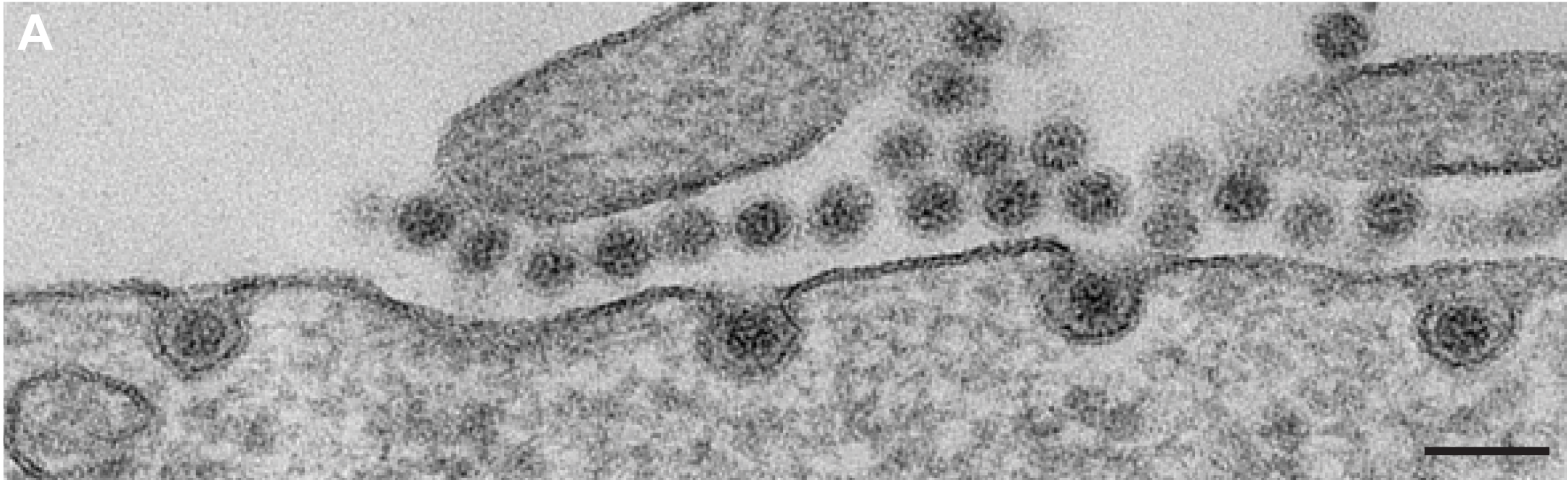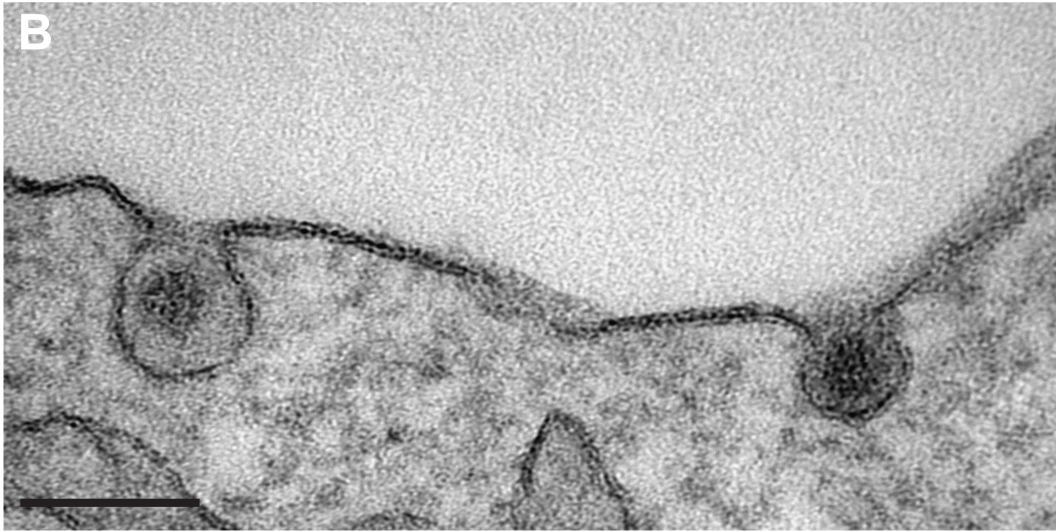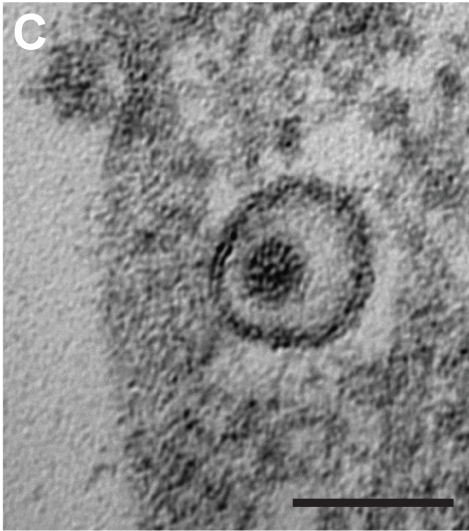

Figure 6

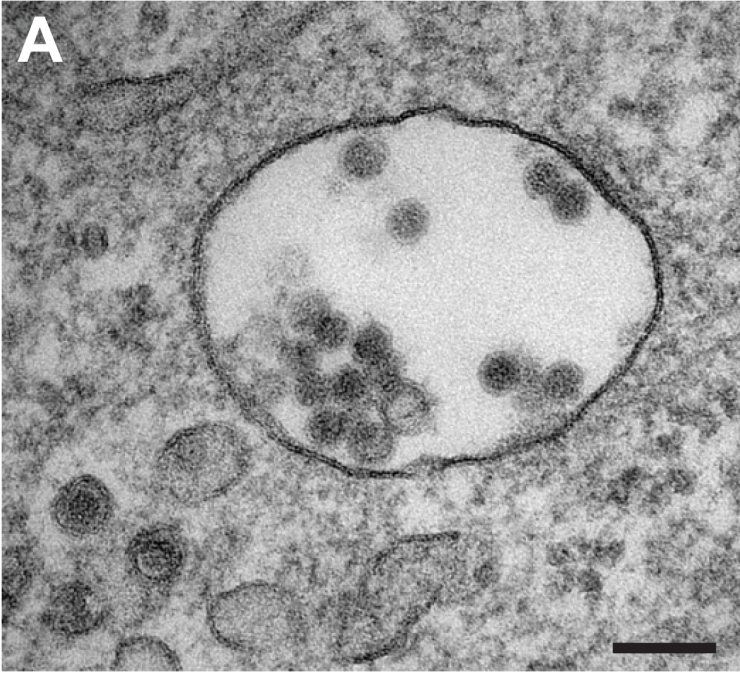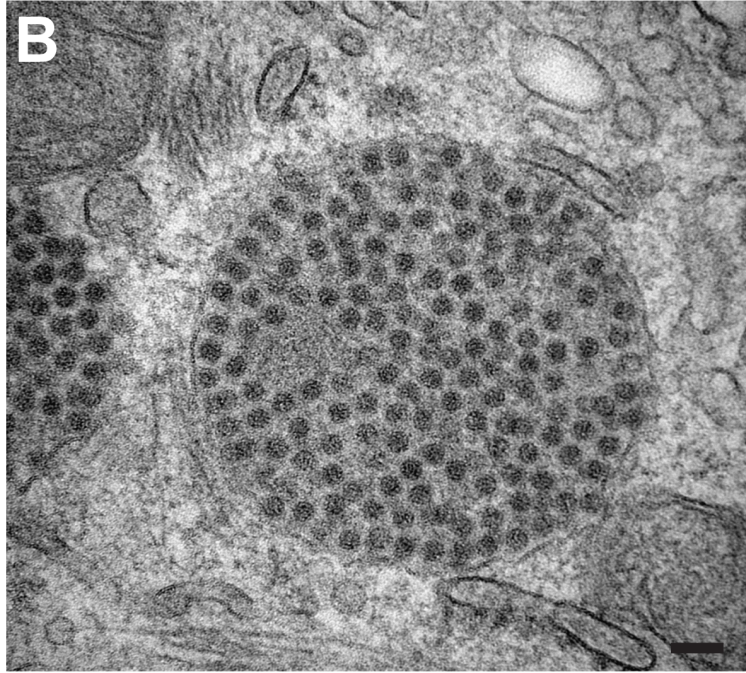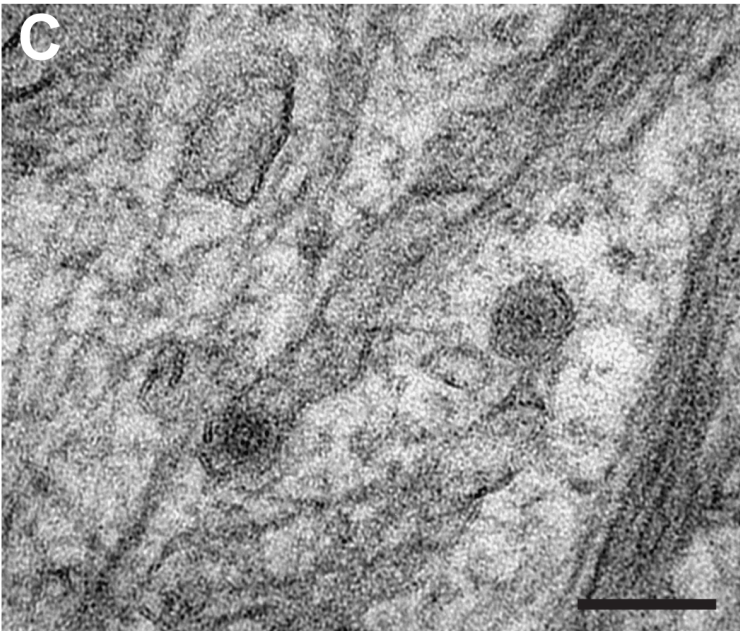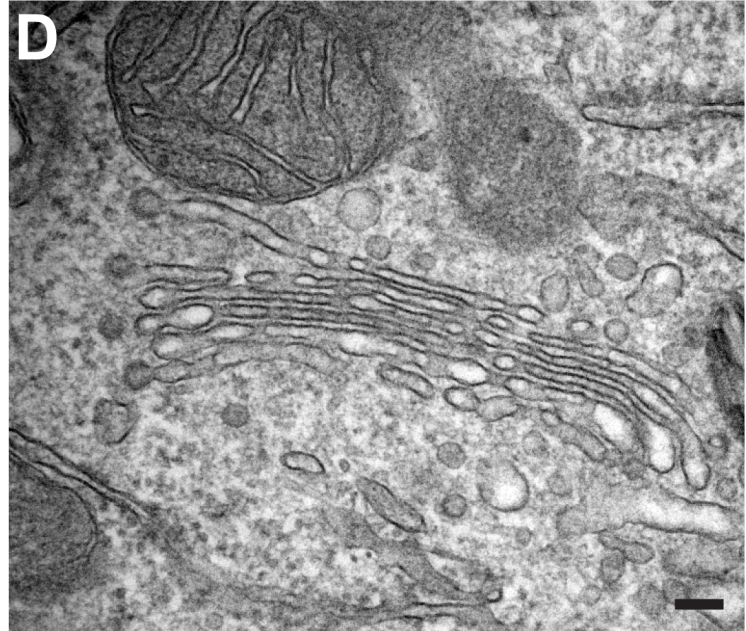

Figure 7

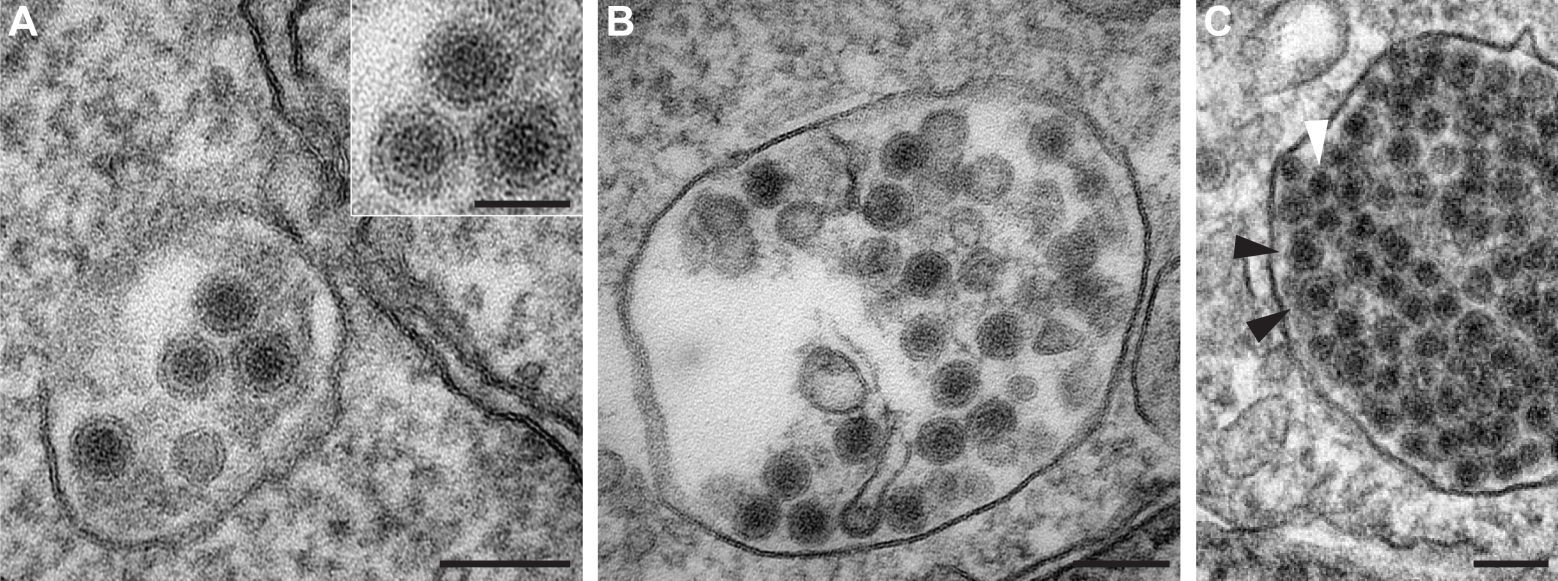

Figure 8

**A** WT

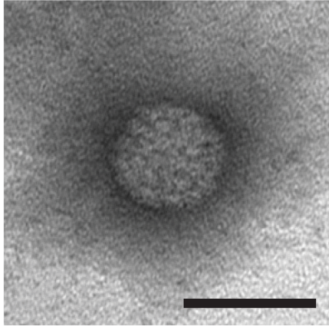

**B** W76A

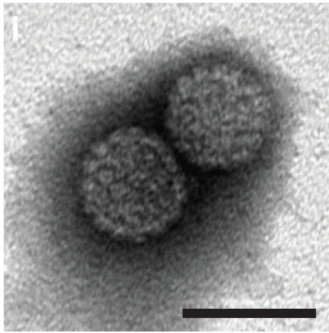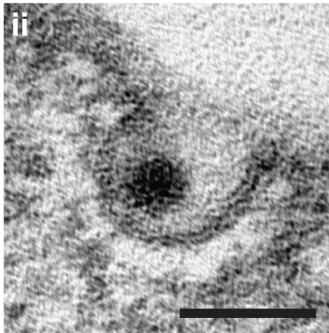

**C** Y81V

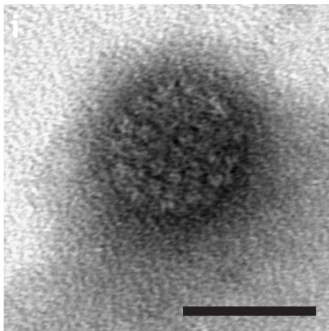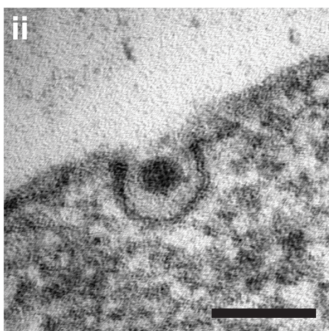

**D**

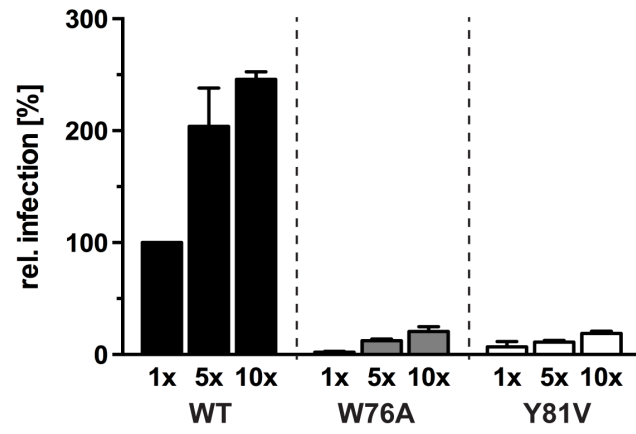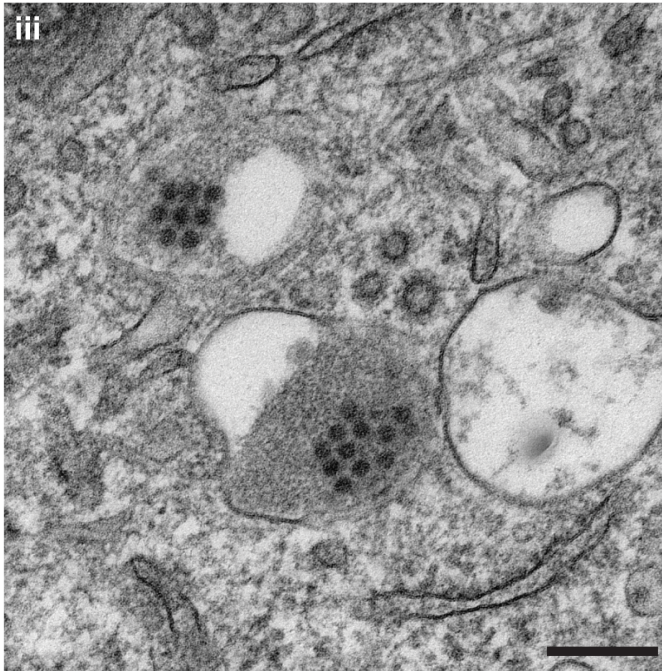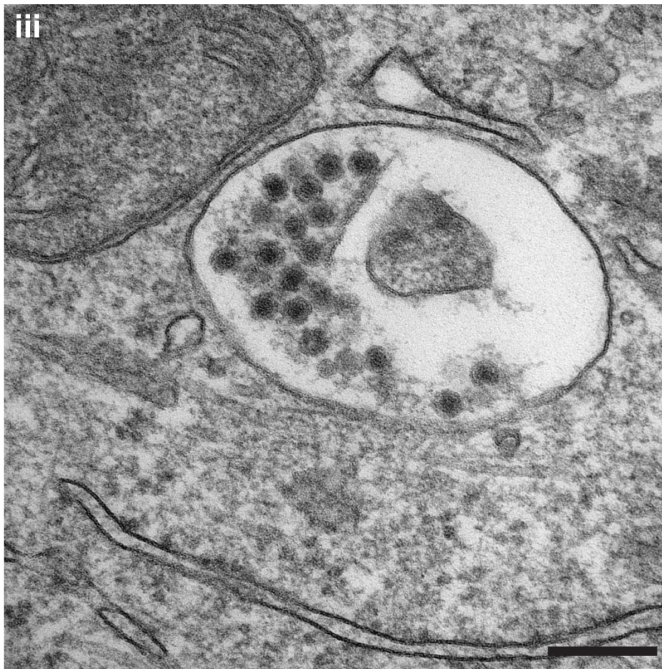

A 3'-Sialyllactose (Neu5Ac( $\alpha$ 2-3)Gal( $\beta$ 1-4)Glc)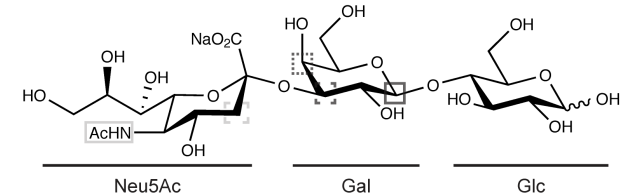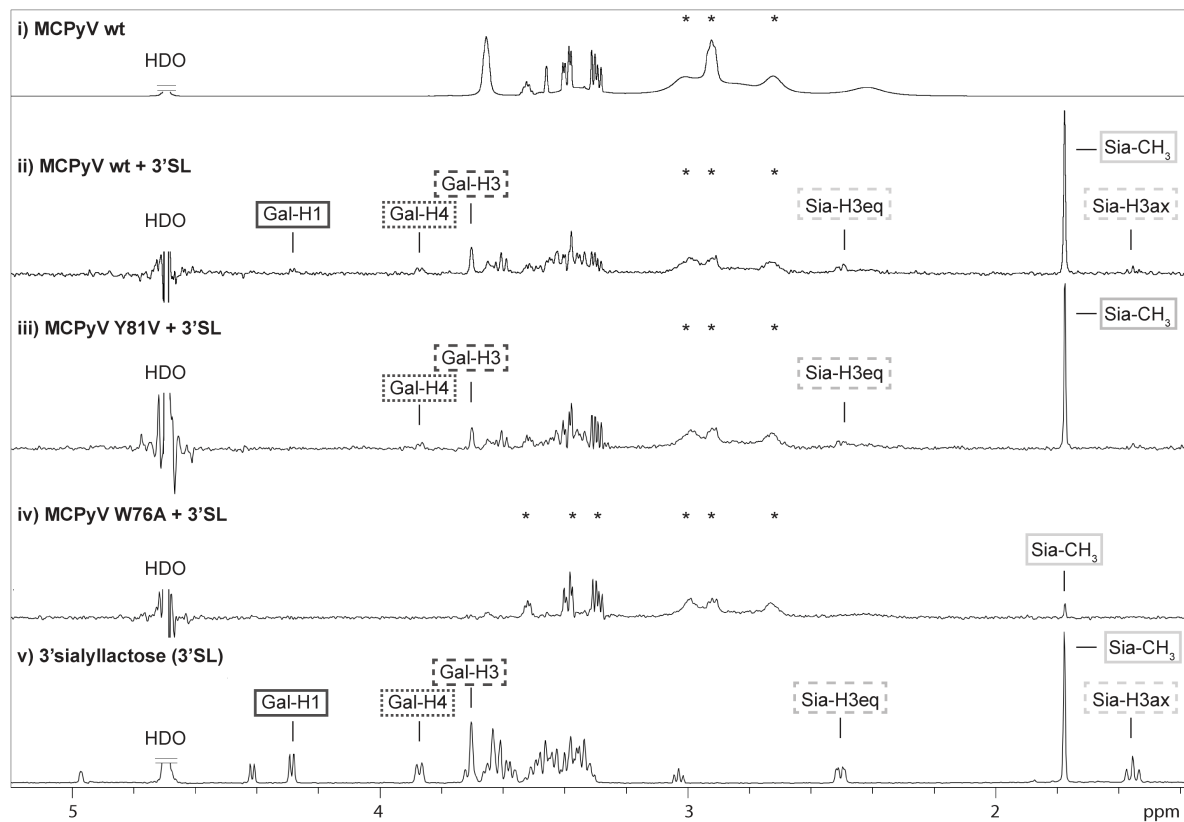

## B Arixtra

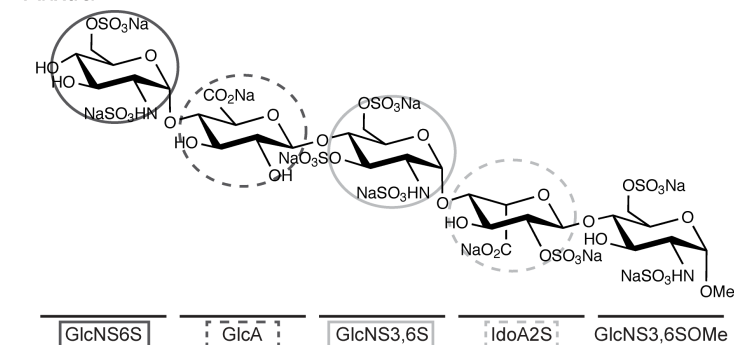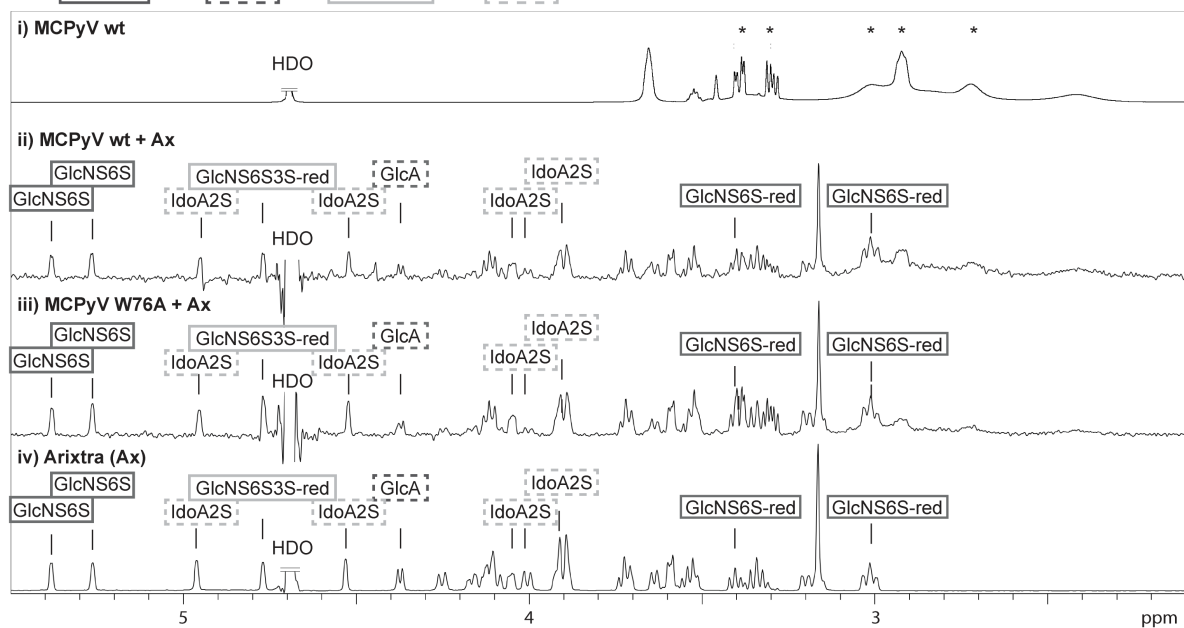

Source: https://www.biorxiv.org/content/biorxiv/early/2018/10/30/456673.full.pdf
